# Supplementary material for: Dual RNA-Seq Reveals Temperature-Mediated Gene Reprogramming and Molecular Crosstalk between Grapevine and Lasiodiplodia theobromae
Source: MDPI journal article supplement (doi:10.3390/jof9121197), 2023-12-14
Supplement: s1 [file s1]

Supplementary Table 1. Primers used in the study.

| Primer name | Sequence (5'-3')       | Use of primer                                          |
|-------------|------------------------|--------------------------------------------------------|
| 100268095-f | CAAGTGAAGGTAACCGTTCT   | Used for RT-qPCR assay                                 |
| 100268095-r | CTGCTTCTGTTCTGGTATTGA  |                                                        |
| 100250417-f | GGAATTAAGCCTGCCCATTAG  | Used for RT-qPCR assay                                 |
| 100250417-r | CCATCACTCTCATCCACTCTT  |                                                        |
| 100243120-f | GAGTGGAAGAAGGCTGCTAAT  | Used for RT-qPCR assay                                 |
| 100243120-r | GCACCGAACACCAAGATAGT   |                                                        |
| 100252105-f | GAGAACCTGGAGACCTGAAGT  | Used for RT-qPCR assay                                 |
| 100252105-r | AAGCCAACAAGAGCCTGAAC   |                                                        |
| 100246301-f | TGTTCTTCGTCTCGCTTTCT   | Used for RT-qPCR assay                                 |
| 100246301-r | GTCGTTTCATCCATCCACCTAT |                                                        |
| 100266654-f | GGACTTTGCTTGATGGAAGTC  | Used for RT-qPCR assay                                 |
| 100266654-r | GGAGGAATGGTTGTTGAAGAC  |                                                        |
| VvActin-f   | CTACTCCTTCACCACCACAG   | Used for the internal control of R<br>T-qPCR detection |
| VvActin-r   | TCCATCAGGCAACTCATAGC   |                                                        |
| g3337-f     | GACGGCAAGAGGAACGAGAAG  | Used for RT-qPCR assay                                 |
| g3337-r     | CCAACGCAGTCGCTAGTGAA   |                                                        |
| g2480-f     | CGCAGAACGGATGAGTATGG   | Used for RT-qPCR assay                                 |
| g2480-r     | CGACCGAGTTGAGCTTGATT   |                                                        |
| g6412-f     | ACGCCATCCACTTCCACAAG   | Used for RT-qPCR assay                                 |
| g6412-r     | TCCGTCTCGTCCAAGTCATCA  |                                                        |

|           |                       |                                                        |
|-----------|-----------------------|--------------------------------------------------------|
| g12383-f  | CGTGAATGGCGAGGGTTCTG  | Used for RT-qPCR assay                                 |
| g12383-r  | GGTTATGGCGTGCTGGTTGAT |                                                        |
| g2686-f   | TCATTGTGACGGATCTGGTT  | Used for RT-qPCR assay                                 |
| g2686-r   | ATGAAGATGACGACGAAGGT  |                                                        |
| g7069-f   | GACTACGCAACGGAGAAGAG  | Used for RT-qPCR assay                                 |
| g7069-r   | GGAAGAAGTGGTCGTCTGAG  |                                                        |
| LtActin-f | CCAAGTCCAACCGTGAGAAG  | Used for the internal control of R<br>T-qPCR detection |
| LtActin-r | GAAGCGTACAGCGACAGAAC  |                                                        |

---
