# Supplementary material for: Dual RNA-Seq Reveals Temperature-Mediated Gene Reprogramming and Molecular Crosstalk between Grapevine and Lasiodiplodia theobromae
Source: MDPI journal article supplement (doi:10.3390/jof9121197), 2023-12-14
Supplement: s1 [file s1]

Supplementary Table 2. Summary results of the sequencing reads of grapevine samples infected by *L. theobromae*.

| Smaples  | Raw_reads | Clean_reads | map_to_grape | grape_map_ratio | map_to_fungi | fungi_map_ratio |
|----------|-----------|-------------|--------------|-----------------|--------------|-----------------|
| Y24T25_1 | 65037081  | 63562580    | 51199564     | 80.55%          | 1201724      | 1.89%           |
| Y24T25_2 | 61404023  | 59834598    | 48671764     | 81.34%          | 903614       | 1.51%           |
| Y24T25_3 | 61742918  | 60136126    | 48398502     | 80.48%          | 923256       | 1.54%           |
| Y24T30_1 | 65080539  | 63740330    | 52541714     | 82.43%          | 274652       | 0.43%           |
| Y24T30_2 | 54650481  | 53502304    | 43613938     | 81.52%          | 229386       | 0.43%           |
| Y24T30_3 | 59616046  | 58401020    | 47556218     | 81.43%          | 472232       | 0.81%           |
| Y24T35_1 | 51620779  | 50116030    | 39933094     | 79.68%          | 636978       | 1.27%           |
| Y24T35_2 | 57714664  | 56724110    | 46278792     | 81.59%          | 293312       | 0.52%           |
| Y24T35_3 | 57752708  | 56250564    | 45949744     | 81.69%          | 302800       | 0.54%           |
| Y48T25_1 | 51513853  | 50469300    | 40296506     | 79.84%          | 816674       | 1.62%           |
| Y48T25_2 | 53178005  | 52069812    | 42338598     | 81.31%          | 520078       | 1.00%           |
| Y48T25_3 | 54907292  | 53734174    | 42877582     | 79.80%          | 862380       | 1.60%           |
| Y48T30_1 | 44571670  | 43527982    | 35993852     | 82.69%          | 106510       | 0.24%           |
| Y48T30_2 | 53195953  | 51994096    | 42435594     | 81.62%          | 114634       | 0.22%           |
| Y48T30_3 | 46917202  | 45389888    | 37253580     | 82.07%          | 155370       | 0.34%           |
| Y48T35_1 | 59209021  | 57430506    | 46779302     | 81.45%          | 136790       | 0.24%           |
| Y48T35_2 | 59935500  | 58403616    | 46385984     | 79.42%          | 713802       | 1.22%           |
| Y48T35_3 | 55503076  | 54118246    | 44706080     | 82.61%          | 113920       | 0.21%           |
| Y72T25_1 | 56189138  | 54793648    | 45012732     | 82.15%          | 77438        | 0.14%           |
| Y72T25_2 | 59666933  | 58392448    | 48298830     | 82.71%          | 145198       | 0.25%           |
| Y72T25_3 | 49647814  | 48569196    | 39900464     | 82.15%          | 335804       | 0.69%           |
| Y72T30_1 | 56028685  | 54556356    | 44145726     | 80.92%          | 438794       | 0.80%           |
| Y72T30_2 | 59824543  | 58316216    | 46988242     | 80.57%          | 520812       | 0.89%           |
| Y72T30_3 | 52434644  | 51259420    | 42316632     | 82.55%          | 238038       | 0.46%           |
| Y72T35_1 | 57311036  | 56146454    | 45385732     | 80.83%          | 154380       | 0.27%           |
| Y72T35_2 | 53702323  | 52463016    | 42074454     | 80.20%          | 502222       | 0.96%           |
| Y72T35_3 | 56963238  | 55567494    | 44916006     | 80.83%          | 145368       | 0.26%           |
