# Supplementary material for: Dual RNA-Seq Reveals Temperature-Mediated Gene Reprogramming and Molecular Crosstalk between Grapevine and Lasiodiplodia theobromae
Source: MDPI journal article supplement (doi:10.3390/jof9121197), 2023-12-14
Supplement: s1 [file s1]

Supplementary Table 3. List of grapevine temperature-correlated genes found in correlated modules between grapevine and *L. theobromae*.

|    | Grapevine<br>_module | <i>L. theobromae</i><br>_module | Gene      | Description                                                         |
|----|----------------------|---------------------------------|-----------|---------------------------------------------------------------------|
| 1  | G-pink               | F-brown                         | 100232889 | ripening-related bZIP protein-like                                  |
| 2  | G-pink               | F-brown                         | 100233076 | glucan endo-1, 3-beta-glucosidase                                   |
| 3  | G-pink               | F-brown                         | 100244508 | adagio protein 1                                                    |
| 4  | G-pink               | F-brown                         | 100245170 | O-fucosyltransferase 15                                             |
| 5  | G-pink               | F-brown                         | 100246781 | cytochrome P450 736A117                                             |
| 6  | G-pink               | F-brown                         | 100247186 | protein detoxification 27                                           |
| 7  | G-pink               | F-brown                         | 100247368 | uncharacterized LOC100247368                                        |
| 8  | G-pink               | F-brown                         | 100248690 | cold-regulated 413 plasma membrane<br>protein 2                     |
| 9  | G-pink               | F-brown                         | 100251651 | uncharacterized LOC100251651                                        |
| 10 | G-pink               | F-brown                         | 100253180 | CBL-interacting protein kinase 04                                   |
| 11 | G-pink               | F-brown                         | 100260954 | protein MEI2-like 4                                                 |
| 12 | G-pink               | F-brown                         | 100261257 | cysteine proteinase COT44                                           |
| 13 | G-pink               | F-brown                         | 100262654 | sec1 family domain-containing protein<br>MIP3                       |
| 14 | G-pink               | F-brown                         | 100264030 | phosphatidylinositol 4-kinase gamma 3                               |
| 15 | G-pink               | F-brown                         | 100264466 | uncharacterized LOC100264466                                        |
| 16 | G-pink               | F-brown                         | 100265388 | putative BPI/LBP family protein<br>At1g04970                        |
| 17 | G-pink               | F-brown                         | 100265471 | probable xyloglucan<br>endotransglucosylase/hydrolase protein<br>32 |
| 18 | G-pink               | F-brown                         | 100266331 | aldehyde dehydrogenase family 3<br>member H1                        |
| 19 | G-pink               | F-brown                         | 100266362 | paramyosin                                                          |
| 20 | G-pink               | F-brown                         | 100266572 | glycine-rich domain-containing protein 2                            |
| 21 | G-pink               | F-brown                         | 100268095 | tocopherol cyclase, chloroplastic                                   |
| 22 | G-pink               | F-brown                         | novel.408 | -                                                                   |
| 1  | G-pink               | F-red                           | 100232889 | ripening-related bZIP protein-like                                  |
| 2  | G-pink               | F-red                           | 100244508 | adagio protein 1                                                    |
| 3  | G-pink               | F-red                           | 100246781 | cytochrome P450 71A3                                                |
| 4  | G-pink               | F-red                           | 100247186 | protein detoxification 27                                           |
| 5  | G-pink               | F-red                           | 100247368 | uncharacterized LOC100247368                                        |
| 6  | G-pink               | F-red                           | 100248696 | autophagy-related protein 8i                                        |
| 7  | G-pink               | F-red                           | 100253180 | CBL-interacting protein kinase 04                                   |
| 8  | G-pink               | F-red                           | 100256125 | uncharacterized LOC100256125                                        |
| 9  | G-pink               | F-red                           | 100260954 | protein MEI2-like 4                                                 |
| 10 | G-pink               | F-red                           | 100261030 | protein MEI2-like 4                                                 |

|    |        |           |           |                                                                   |
|----|--------|-----------|-----------|-------------------------------------------------------------------|
| 11 | G-pink | F-red     | 100262863 | profilin-1                                                        |
| 12 | G-pink | F-red     | 100262931 | uncharacterized LOC100262931                                      |
| 13 | G-pink | F-red     | 100264190 | WD repeat-containing protein 44                                   |
| 14 | G-pink | F-red     | 100264466 | uncharacterized LOC100264466                                      |
| 15 | G-pink | F-red     | 100265471 | probable xyloglucan<br>endotransglucosylase/hydrolase protein 32  |
| 16 | G-pink | F-red     | 100265815 | vacuolar amino acid transporter 1                                 |
| 17 | G-pink | F-red     | 100266050 | GABA transporter 1                                                |
| 18 | G-pink | F-red     | 100266130 | box C/D snoRNA protein 1                                          |
| 19 | G-pink | F-red     | 100266362 | paramyosin                                                        |
| 20 | G-pink | F-red     | 100266572 | glycine-rich domain-containing protein 2                          |
| 21 | G-pink | F-red     | 104877310 | beta-glucosidase 18                                               |
| 22 | G-pink | F-red     | novel.408 | -                                                                 |
| 1  | G-pink | F-darkred | 100244508 | adagio protein 1                                                  |
| 2  | G-pink | F-darkred | 100246301 | probable inositol transporter 2                                   |
| 3  | G-pink | F-darkred | 100247561 | deoxyhypusine synthase                                            |
| 4  | G-pink | F-darkred | 100248377 | omega-6 fatty acid desaturase, chloroplastic                      |
| 5  | G-pink | F-darkred | 100249560 | AT-hook motif nuclear-localized protein 5                         |
| 6  | G-pink | F-darkred | 100250069 | protein ENHANCED DISEASE<br>RESISTANCE 2-like                     |
| 7  | G-pink | F-darkred | 100251651 | uncharacterized LOC100251651                                      |
| 8  | G-pink | F-darkred | 100254964 | cysteine-rich and transmembrane domain-<br>containing protein A   |
| 9  | G-pink | F-darkred | 100255560 | LRR receptor-like serine/threonine-protein<br>kinase GSO2         |
| 10 | G-pink | F-darkred | 100256125 | uncharacterized LOC100256125                                      |
| 11 | G-pink | F-darkred | 100259117 | uncharacterized LOC100259117                                      |
| 12 | G-pink | F-darkred | 100260954 | protein MEI2-like 4                                               |
| 13 | G-pink | F-darkred | 100261030 | protein MEI2-like 4                                               |
| 14 | G-pink | F-darkred | 100261257 | cysteine proteinase COT44                                         |
| 15 | G-pink | F-darkred | 100263828 | RINT1-like protein MAG2                                           |
| 16 | G-pink | F-darkred | 100264466 | uncharacterized LOC100264466                                      |
| 17 | G-pink | F-darkred | 100265388 | putative BPI/LBP family protein At1g04970                         |
| 18 | G-pink | F-darkred | 100265815 | vacuolar amino acid transporter 1                                 |
| 19 | G-pink | F-darkred | 100266362 | paramyosin                                                        |
| 20 | G-pink | F-darkred | 100268095 | tocopherol cyclase, chloroplastic                                 |
| 1  | G-blue | F-red     | 100241091 | nudix hydrolase 14, chloroplastic-like                            |
| 2  | G-blue | F-red     | 100241158 | 60S ribosomal protein L32-1                                       |
| 3  | G-blue | F-red     | 100241169 | putative ALA-interacting subunit 2                                |
| 4  | G-blue | F-red     | 100241270 | putative pentatricopeptide repeat-containing<br>protein At1g09680 |
| 5  | G-blue | F-red     | 100242205 | protein POLLEN DEFECTIVE IN<br>GUIDANCE 1                         |
| 6  | G-blue | F-red     | 100243115 | protein translation factor SUI1 homolog 1                         |

|    |        |       |           |                                                                             |
|----|--------|-------|-----------|-----------------------------------------------------------------------------|
| 7  | G-blue | F-red | 100243120 | protein disulfide isomerase-like 2-3                                        |
| 8  | G-blue | F-red | 100243248 | transcription factor RF2b                                                   |
| 9  | G-blue | F-red | 100244643 | 14-3-3-like protein B                                                       |
| 10 | G-blue | F-red | 100246124 | probable pectate lyase 12-like                                              |
| 11 | G-blue | F-red | 100246648 | RNA-binding protein 42                                                      |
| 12 | G-blue | F-red | 100247016 | uncharacterized protein At1g04910                                           |
| 13 | G-blue | F-red | 100247365 | GTP-binding nuclear protein Ran-3                                           |
| 14 | G-blue | F-red | 100248135 | calcyclin-binding protein                                                   |
| 15 | G-blue | F-red | 100248504 | PRA1 family protein E                                                       |
| 16 | G-blue | F-red | 100248687 | 2-hydroxyisoflavanone dehydratase                                           |
| 17 | G-blue | F-red | 100248914 | chaperone protein DnaJ                                                      |
| 18 | G-blue | F-red | 100249097 | peptidyl-prolyl cis-trans isomerase FKBP62                                  |
| 19 | G-blue | F-red | 100249249 | multiprotein-bridging factor 1c                                             |
| 20 | G-blue | F-red | 100249262 | uncharacterized LOC100249262                                                |
| 21 | G-blue | F-red | 100249761 | uncharacterized protein YwbO                                                |
| 22 | G-blue | F-red | 100250042 | non-specific lipid-transfer protein-like                                    |
| 23 | G-blue | F-red | 100250368 | FAD synthase                                                                |
| 24 | G-blue | F-red | 100250629 | selenoprotein K-like                                                        |
| 25 | G-blue | F-red | 100251534 | probable inactive ATP-dependent zinc metalloprotease FTSHI 2, chloroplastic |
| 26 | G-blue | F-red | 100252105 | dnaJ protein ERDJ3B                                                         |
| 27 | G-blue | F-red | 100252468 | bifunctional purple acid phosphatase 26                                     |
| 28 | G-blue | F-red | 100252886 | purple acid phosphatase 23                                                  |
| 29 | G-blue | F-red | 100253897 | vesicle-associated protein 1-3                                              |
| 30 | G-blue | F-red | 100254197 | protein GIGANTEA                                                            |
| 31 | G-blue | F-red | 100254521 | probable glutathione S-transferase                                          |
| 32 | G-blue | F-red | 100254890 | ultraviolet-B receptor UVR8                                                 |
| 33 | G-blue | F-red | 100255072 | OTU domain-containing protein<br>DDB_G0284757                               |
| 34 | G-blue | F-red | 100255485 | galactinol synthase 1                                                       |
| 35 | G-blue | F-red | 100255655 | F-box protein SKIP23-like                                                   |
| 36 | G-blue | F-red | 100255660 | uncharacterized LOC100255660                                                |
| 37 | G-blue | F-red | 100257397 | uncharacterized protein OsI_027940                                          |
| 38 | G-blue | F-red | 100258175 | uncharacterized LOC100258175                                                |
| 39 | G-blue | F-red | 100258274 | probable plastid-lipid-associated protein 4,<br>chloroplastic               |
| 40 | G-blue | F-red | 100258986 | peptidyl-prolyl cis-trans isomerase CYP37,<br>chloroplastic                 |
| 41 | G-blue | F-red | 100259138 | protein disulfide-isomerase                                                 |
| 42 | G-blue | F-red | 100259634 | histone acetyltransferase MCC1                                              |
| 43 | G-blue | F-red | 100261774 | uncharacterized LOC100261774                                                |
| 44 | G-blue | F-red | 100262037 | putative pentatricopeptide repeat-containing<br>protein At3g23330           |

|    |        |         |           |                                                                   |
|----|--------|---------|-----------|-------------------------------------------------------------------|
| 45 | G-blue | F-red   | 100262887 | chromatin modification-related protein<br>EAF7                    |
| 46 | G-blue | F-red   | 100266654 | peptidyl-prolyl cis-trans isomerase FKBP62                        |
| 47 | G-blue | F-red   | 100266884 | uncharacterized LOC100266884                                      |
| 48 | G-blue | F-red   | 100267648 | endoplasmic homolog                                               |
| 49 | G-blue | F-red   | 100852521 | carnosine N-methyltransferase                                     |
| 50 | G-blue | F-red   | 100853585 | pentatricopeptide repeat-containing protein<br>At4g17616          |
| 51 | G-blue | F-red   | 100853980 | putative disease resistance RPP13-like<br>protein 1               |
| 52 | G-blue | F-red   | 104878259 | peptidyl-prolyl cis-trans isomerase FKBP65                        |
| 53 | G-blue | F-red   | 104880050 | uncharacterized LOC104880050                                      |
| 54 | G-blue | F-red   | 104880245 | uncharacterized LOC104880245                                      |
| 55 | G-blue | F-red   | 104881877 | uncharacterized LOC104881877                                      |
| 56 | G-blue | F-red   | novel.547 | PF16594: Putative AtpZ or ATP-synthase-<br>associated             |
| 1  | G-blue | F-brown | 100241091 | nudix hydrolase 14, chloroplastic-like                            |
| 2  | G-blue | F-brown | 100241158 | 60S ribosomal protein L32-1                                       |
| 3  | G-blue | F-brown | 100241169 | putative ALA-interacting subunit 2                                |
| 4  | G-blue | F-brown | 100241270 | putative pentatricopeptide repeat-containing<br>protein At1g09680 |
| 5  | G-blue | F-brown | 100242205 | protein POLLEN DEFECTIVE IN<br>GUIDANCE 1                         |
| 6  | G-blue | F-brown | 100242699 | cysteine-rich receptor-like protein kinase 10                     |
| 7  | G-blue | F-brown | 100243115 | protein translation factor SUI1 homolog 1                         |
| 8  | G-blue | F-brown | 100243120 | protein disulfide isomerase-like 2-3                              |
| 9  | G-blue | F-brown | 100244534 | charged multivesicular body protein 5                             |
| 10 | G-blue | F-brown | 100244643 | 14-3-3-like protein B                                             |
| 11 | G-blue | F-brown | 100245010 | gibberellin 2-beta-dioxygenase 1                                  |
| 12 | G-blue | F-brown | 100246124 | probable pectate lyase 12-like                                    |
| 13 | G-blue | F-brown | 100247016 | uncharacterized protein At1g04910                                 |
| 14 | G-blue | F-brown | 100247365 | GTP-binding nuclear protein Ran-3                                 |
| 15 | G-blue | F-brown | 100248135 | calcyclin-binding protein                                         |
| 16 | G-blue | F-brown | 100248504 | PRA1 family protein E                                             |
| 17 | G-blue | F-brown | 100248687 | 2-hydroxyisoflavanone dehydratase                                 |
| 18 | G-blue | F-brown | 100248914 | chaperone protein DnaJ                                            |
| 19 | G-blue | F-brown | 100249097 | peptidyl-prolyl cis-trans isomerase FKBP62                        |
| 20 | G-blue | F-brown | 100249249 | multiprotein-bridging factor 1c                                   |
| 21 | G-blue | F-brown | 100249262 | uncharacterized LOC100249262                                      |
| 22 | G-blue | F-brown | 100249761 | uncharacterized protein YwbO                                      |
| 23 | G-blue | F-brown | 100250042 | non-specific lipid-transfer protein-like                          |
| 24 | G-blue | F-brown | 100250368 | FAD synthase                                                      |
| 25 | G-blue | F-brown | 100250629 | selenoprotein K-like                                              |

|    |        |         |           |                                                                             |
|----|--------|---------|-----------|-----------------------------------------------------------------------------|
| 26 | G-blue | F-brown | 100251534 | probable inactive ATP-dependent zinc metalloprotease FTSHI 2, chloroplastic |
| 27 | G-blue | F-brown | 100251783 | transcription repressor MYB6                                                |
| 28 | G-blue | F-brown | 100252105 | dnaJ protein ERDJ3B                                                         |
| 29 | G-blue | F-brown | 100252468 | bifunctional purple acid phosphatase 26                                     |
| 30 | G-blue | F-brown | 100252886 | purple acid phosphatase 23                                                  |
| 31 | G-blue | F-brown | 100253622 | multiple inositol polyphosphate phosphatase 1                               |
| 32 | G-blue | F-brown | 100253897 | vesicle-associated protein 1-3                                              |
| 33 | G-blue | F-brown | 100254197 | protein GIGANTEA                                                            |
| 34 | G-blue | F-brown | 100254521 | probable glutathione S-transferase                                          |
| 35 | G-blue | F-brown | 100254890 | ultraviolet-B receptor UVR8                                                 |
| 36 | G-blue | F-brown | 100255485 | galactinol synthase 1                                                       |
| 37 | G-blue | F-brown | 100255655 | F-box protein SKIP23-like                                                   |
| 38 | G-blue | F-brown | 100255660 | uncharacterized LOC100255660                                                |
| 39 | G-blue | F-brown | 100255990 | probable sugar phosphate/phosphate translocator At4g32390                   |
| 40 | G-blue | F-brown | 100258175 | uncharacterized LOC100258175                                                |
| 41 | G-blue | F-brown | 100258274 | probable plastid-lipid-associated protein 4, chloroplastic                  |
| 42 | G-blue | F-brown | 100258986 | peptidyl-prolyl cis-trans isomerase CYP37, chloroplastic                    |
| 43 | G-blue | F-brown | 100259138 | protein disulfide-isomerase                                                 |
| 44 | G-blue | F-brown | 100259634 | histone acetyltransferase MCC1                                              |
| 45 | G-blue | F-brown | 100259801 | tetratricopeptide repeat protein SKI3                                       |
| 46 | G-blue | F-brown | 100260651 | purple acid phosphatase                                                     |
| 47 | G-blue | F-brown | 100261742 | fanconi-associated nuclease 1 homolog                                       |
| 48 | G-blue | F-brown | 100261774 | uncharacterized LOC100261774                                                |
| 49 | G-blue | F-brown | 100261821 | uncharacterized LOC100261821                                                |
| 50 | G-blue | F-brown | 100262037 | putative pentatricopeptide repeat-containing protein At3g23330              |
| 51 | G-blue | F-brown | 100262887 | chromatin modification-related protein EAF7                                 |
| 52 | G-blue | F-brown | 100263126 | DNA polymerase zeta catalytic subunit                                       |
| 53 | G-blue | F-brown | 100266409 | mediator of RNA polymerase II transcription subunit 17                      |
| 54 | G-blue | F-brown | 100266654 | peptidyl-prolyl cis-trans isomerase FKBP62                                  |
| 55 | G-blue | F-brown | 100266884 | uncharacterized LOC100266884                                                |
| 56 | G-blue | F-brown | 100267648 | endoplasmin homolog                                                         |
| 57 | G-blue | F-brown | 100853585 | pentatricopeptide repeat-containing protein At4g17616                       |
| 58 | G-blue | F-brown | 100853980 | putative disease resistance RPP13-like protein 1                            |
| 59 | G-blue | F-brown | 100854999 | multiprotein-bridging factor 1a                                             |

|    |          |         |           |                                                            |
|----|----------|---------|-----------|------------------------------------------------------------|
| 60 | G-blue   | F-brown | 104880245 | uncharacterized LOC104880245                               |
| 61 | G-blue   | F-brown | 104880500 | uncharacterized LOC104880500                               |
| 62 | G-blue   | F-brown | 104881877 | uncharacterized LOC104881877                               |
| 1  | G-salmon | F-red   | 100241586 | protein ALTERED XYLOGLUCAN 4                               |
| 2  | G-salmon | F-red   | 100241983 | glucose-1-phosphate adenylyltransferase<br>large subunit 1 |
| 3  | G-salmon | F-red   | 100245665 | transcription factor SPATULA                               |
| 4  | G-salmon | F-red   | 100247766 | putative protein FAR1-RELATED<br>SEQUENCE 10               |
| 5  | G-salmon | F-red   | 100248070 | uncharacterized LOC100248070                               |
| 6  | G-salmon | F-red   | 100250417 | starch synthase 1, chloroplastic/amyloplastic              |
| 7  | G-salmon | F-red   | 100250529 | chaperone protein DnaJ                                     |
| 8  | G-salmon | F-red   | 100252129 | delta(12)-fatty-acid desaturase FAD2                       |
| 9  | G-salmon | F-red   | 100252368 | filament-like plant protein                                |
| 10 | G-salmon | F-red   | 100254980 | probable amino acid permease 7                             |
| 11 | G-salmon | F-red   | 100256357 | probable tyrosine-protein phosphatase DSP4                 |
| 12 | G-salmon | F-red   | 100256489 | uncharacterized LOC100256489                               |
| 13 | G-salmon | F-red   | 100256713 | (6-4)DNA photolyase                                        |
| 14 | G-salmon | F-red   | 100257229 | fatty acid desaturase 4, chloroplastic                     |
| 15 | G-salmon | F-red   | 100259022 | sodium/hydrogen exchanger 2                                |
| 16 | G-salmon | F-red   | 100259502 | transcription factor MYB24                                 |
| 17 | G-salmon | F-red   | 100261788 | DUF21 domain-containing protein<br>At2g14520               |
| 18 | G-salmon | F-red   | 100262687 | uncharacterized LOC100262687                               |
| 19 | G-salmon | F-red   | 100266070 | signal peptidase complex-like protein DTM1                 |
| 20 | G-salmon | F-red   | 100267134 | methyltransferase At2g41040, chloroplastic                 |
| 21 | G-salmon | F-red   | 100855194 | uncharacterized LOC100855194                               |
| 22 | G-salmon | F-red   | novel.763 | -                                                          |
| 1  | G-salmon | F-brown | 100241983 | glucose-1-phosphate adenylyltransferase<br>large subunit 1 |
| 2  | G-salmon | F-brown | 100245665 | transcription factor SPATULA                               |
| 3  | G-salmon | F-brown | 100249424 | palmitoyl-protein thioesterase 1                           |
| 4  | G-salmon | F-brown | 100250417 | starch synthase 1, chloroplastic/amyloplastic              |
| 5  | G-salmon | F-brown | 100252129 | delta(12)-fatty-acid desaturase FAD2                       |
| 6  | G-salmon | F-brown | 100256713 | (6-4)DNA photolyase                                        |
| 7  | G-salmon | F-brown | 100257526 | aminoacylase-1                                             |
| 8  | G-salmon | F-brown | 100265331 | probable bifunctional TENA-E protein                       |
| 9  | G-salmon | F-brown | 100266070 | signal peptidase complex-like protein DTM1                 |
| 10 | G-salmon | F-brown | 100855194 | uncharacterized LOC100855194                               |
| 1  | G-green  | F-brown | 100232932 | peroxisomal (S)-2-hydroxy-acid oxidase<br>GLO1             |
| 2  | G-green  | F-brown | 100241466 | transcription factor bHLH106                               |
| 3  | G-green  | F-brown | 100241564 | nudix hydrolase 3                                          |
| 4  | G-green  | F-brown | 100242242 | 60S ribosomal protein L26-1                                |

|    |         |           |           |                                                   |
|----|---------|-----------|-----------|---------------------------------------------------|
| 5  | G-green | F-brown   | 100244972 | CBL-interacting protein kinase 11                 |
| 6  | G-green | F-brown   | 100245662 | 3 beta-hydroxysteroid-dehydrogenase/decarboxylase |
| 7  | G-green | F-brown   | 100247214 | 60S ribosomal protein L8                          |
| 8  | G-green | F-brown   | 100247371 | 60S ribosomal protein L37-3                       |
| 9  | G-green | F-brown   | 100247446 | vacuolar iron transporter 1                       |
| 10 | G-green | F-brown   | 100248037 | 40S ribosomal protein S27-2                       |
| 11 | G-green | F-brown   | 100248155 | uncharacterized LOC100248155                      |
| 12 | G-green | F-brown   | 100248907 | E3 ubiquitin ligase BIG BROTHER-related           |
| 13 | G-green | F-brown   | 100251464 | 60S ribosomal protein L11-1                       |
| 14 | G-green | F-brown   | 100251538 | -                                                 |
| 15 | G-green | F-brown   | 100252536 | 40S ribosomal protein S7                          |
| 16 | G-green | F-brown   | 100253421 | CRS2-associated factor 2 chloroplastic            |
| 17 | G-green | F-brown   | 100253706 | -                                                 |
| 18 | G-green | F-brown   | 100255902 | 60S ribosomal protein L7a-1                       |
| 19 | G-green | F-brown   | 100257178 | 40S ribosomal protein S8                          |
| 20 | G-green | F-brown   | 100260533 | 60S ribosomal protein L3                          |
| 21 | G-green | F-brown   | 100261522 | elongation factor 1-beta 1                        |
| 22 | G-green | F-brown   | 100262686 | 40S ribosomal protein S4-3                        |
| 23 | G-green | F-brown   | 100266357 | probable protein arginine N-methyltransferase 1   |
| 24 | G-green | F-brown   | 100852874 | eukaryotic translation initiation factor 5A-2     |
| 25 | G-green | F-brown   | 100855039 | 60S ribosomal protein L26-1                       |
| 26 | G-green | F-brown   | 109121414 | AB hydrolase superfamily protein YfhM-like        |
| 1  | G-green | F-darkred | 100244384 | 60S ribosomal protein L12-like                    |
| 2  | G-green | F-darkred | 100248037 | 40S ribosomal protein S27-2                       |
| 3  | G-green | F-darkred | 100248134 | ABC transporter G family member 29                |
| 4  | G-green | F-darkred | 100248907 | E3 ubiquitin ligase BIG BROTHER-related           |
| 5  | G-green | F-darkred | 100249575 | T-complex protein 1 subunit alpha                 |
| 6  | G-green | F-darkred | 100251414 | cytochrome c oxidase assembly protein COX15       |
| 7  | G-green | F-darkred | 100251464 | 60S ribosomal protein L11-1                       |
| 8  | G-green | F-darkred | 100251538 | -                                                 |
| 9  | G-green | F-darkred | 100251826 | 60S ribosomal protein L4                          |
| 10 | G-green | F-darkred | 100252524 | elongation factor 1-delta                         |
| 11 | G-green | F-darkred | 100252536 | 40S ribosomal protein S7                          |
| 12 | G-green | F-darkred | 100254719 | 60S ribosomal protein L23a                        |
| 13 | G-green | F-darkred | 100255682 | T-complex protein 1 subunit epsilon               |
| 14 | G-green | F-darkred | 100257178 | 40S ribosomal protein S8                          |
| 15 | G-green | F-darkred | 100260208 | 60S ribosomal protein L14-1                       |
| 16 | G-green | F-darkred | 100260533 | 60S ribosomal protein L3                          |
| 17 | G-green | F-darkred | 100261522 | elongation factor 1-beta 1                        |
| 18 | G-green | F-darkred | 100261817 | 60S ribosomal protein L28-2                       |

|    |         |           |           |                                                   |
|----|---------|-----------|-----------|---------------------------------------------------|
| 19 | G-green | F-darkred | 100262608 | 60S ribosomal protein L17-2                       |
| 20 | G-green | F-darkred | 100262686 | 40S ribosomal protein S4-3                        |
| 21 | G-green | F-darkred | 100265608 | RGG repeats nuclear RNA binding protein<br>A-like |
| 22 | G-green | F-darkred | 100266487 | 60S ribosomal protein L10a-1                      |
| 23 | G-green | F-darkred | 100852874 | eukaryotic translation initiation factor 5A-2     |
| 24 | G-green | F-darkred | 109121414 | AB hydrolase superfamily protein YfhM-<br>like    |

---
