# Supplementary material for: Dual RNA-Seq Reveals Temperature-Mediated Gene Reprogramming and Molecular Crosstalk between Grapevine and Lasiodiplodia theobromae
Source: MDPI journal article supplement (doi:10.3390/jof9121197), 2023-12-14
Supplement: s1 [file s1]

Fig. S1 Overview of grapevine and *L. theobromae* modules correlation to each other.

Grapevine Module (G)– Fungal Module (F) correlations

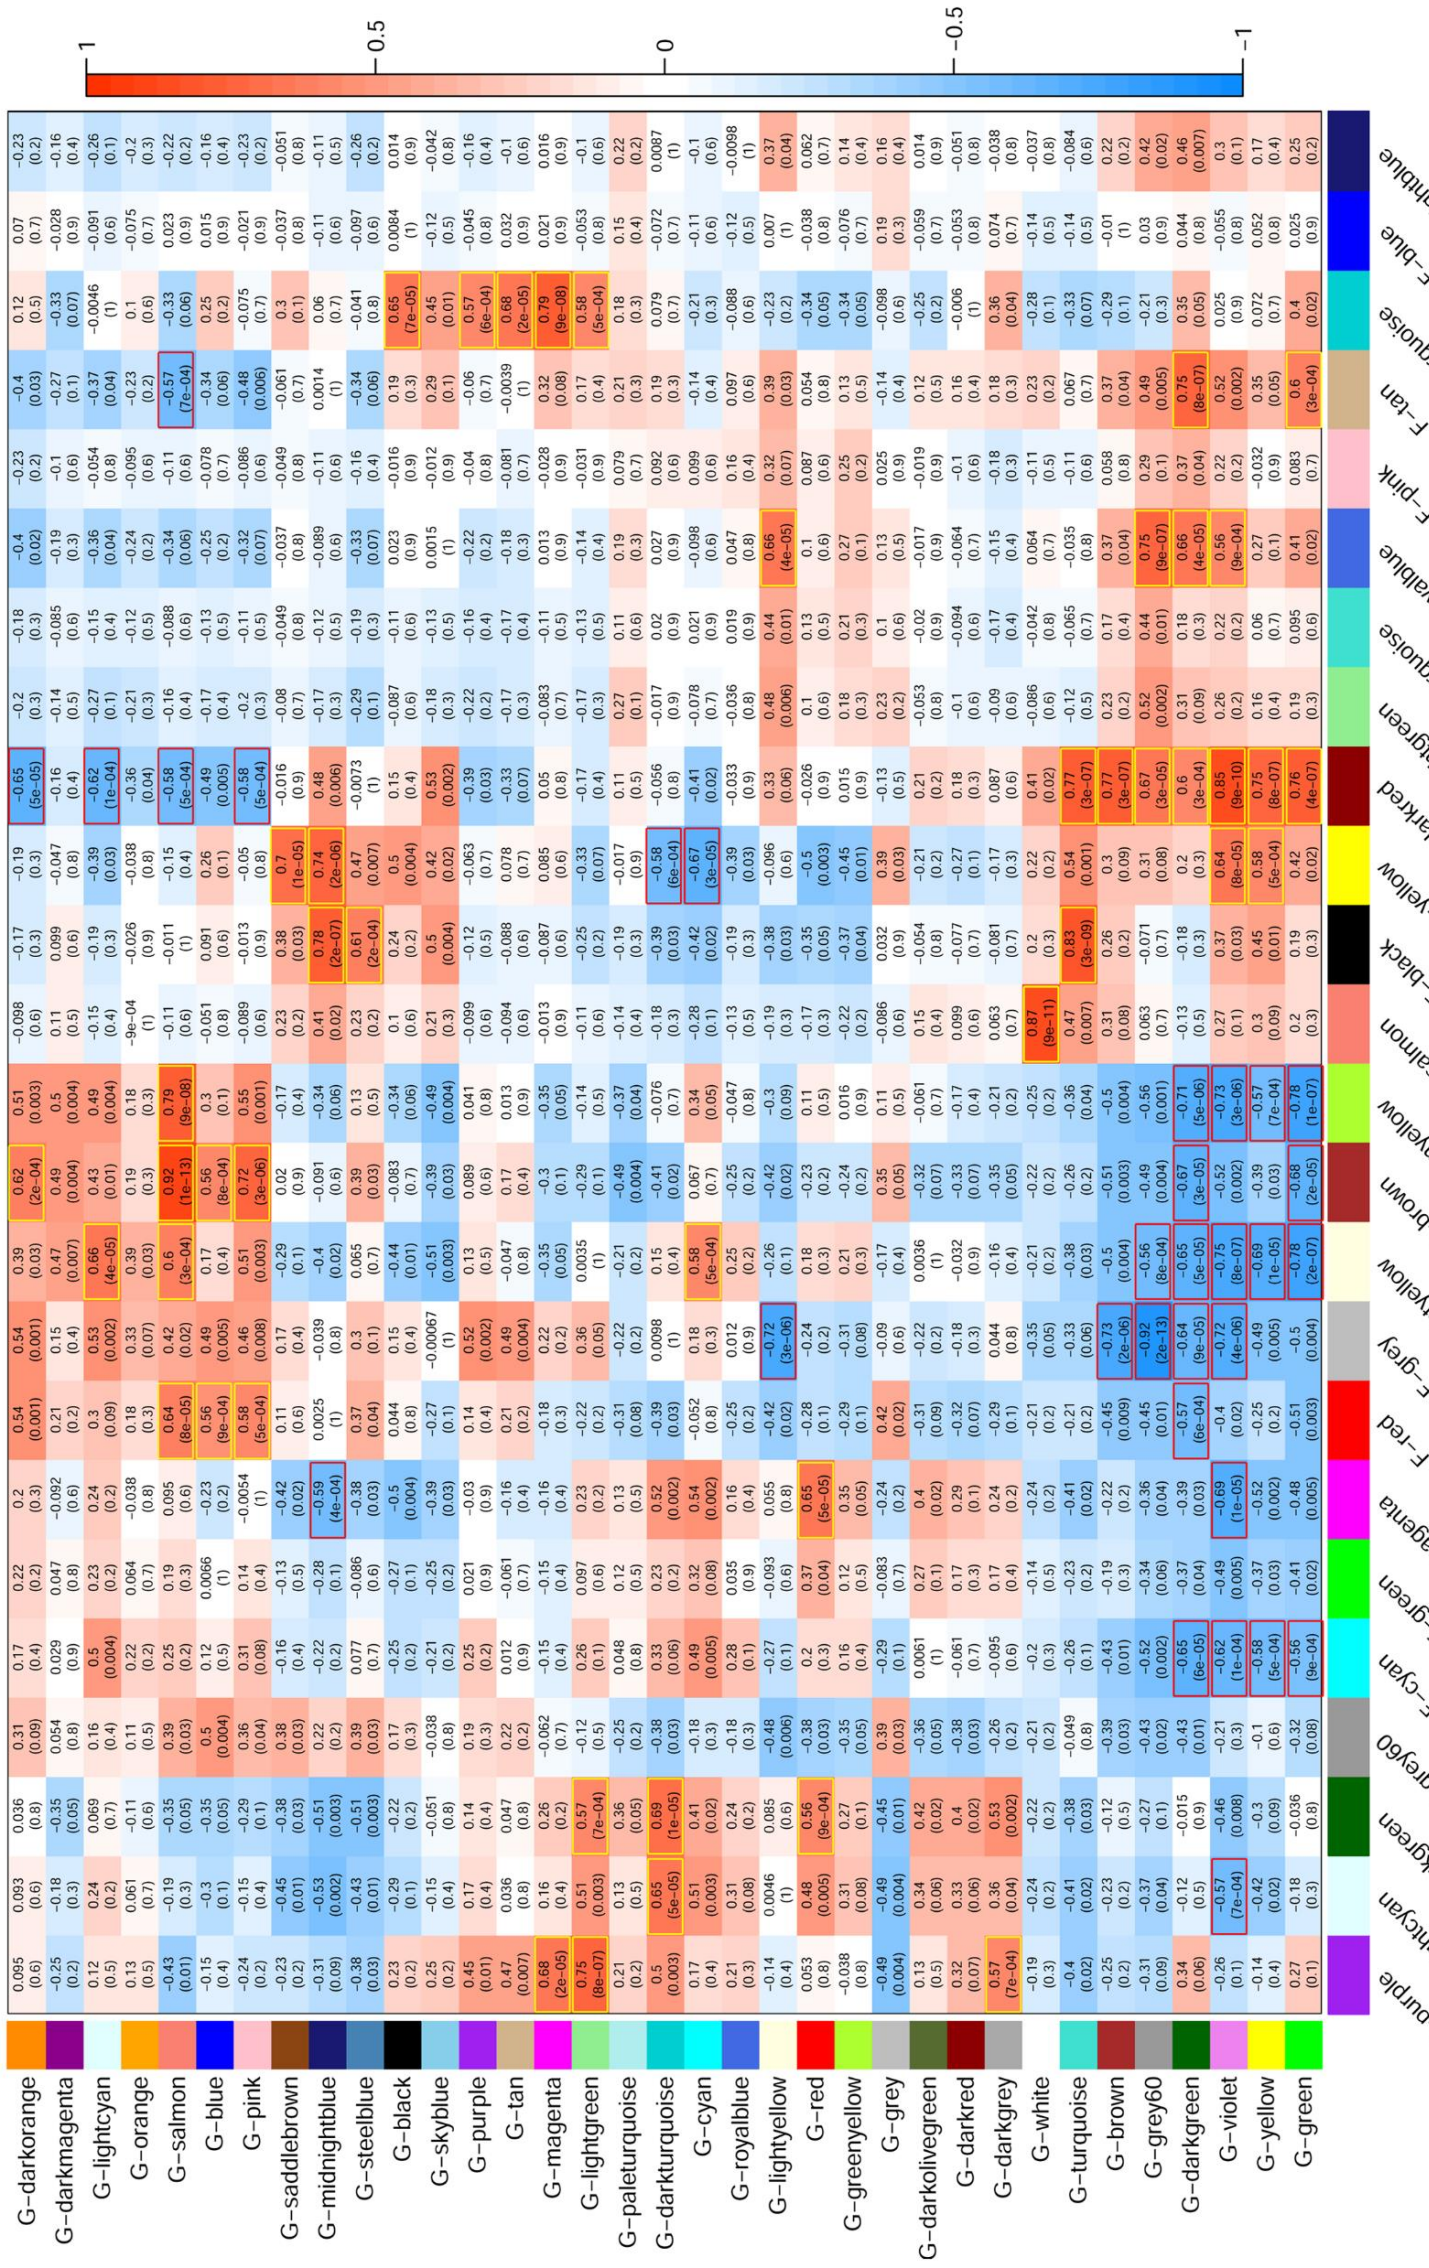

Fig. S2 Gene Ontology analyses of key genes within grapevine G–pink module that are correlated with *L. theobromae* F–brown module and temperature.

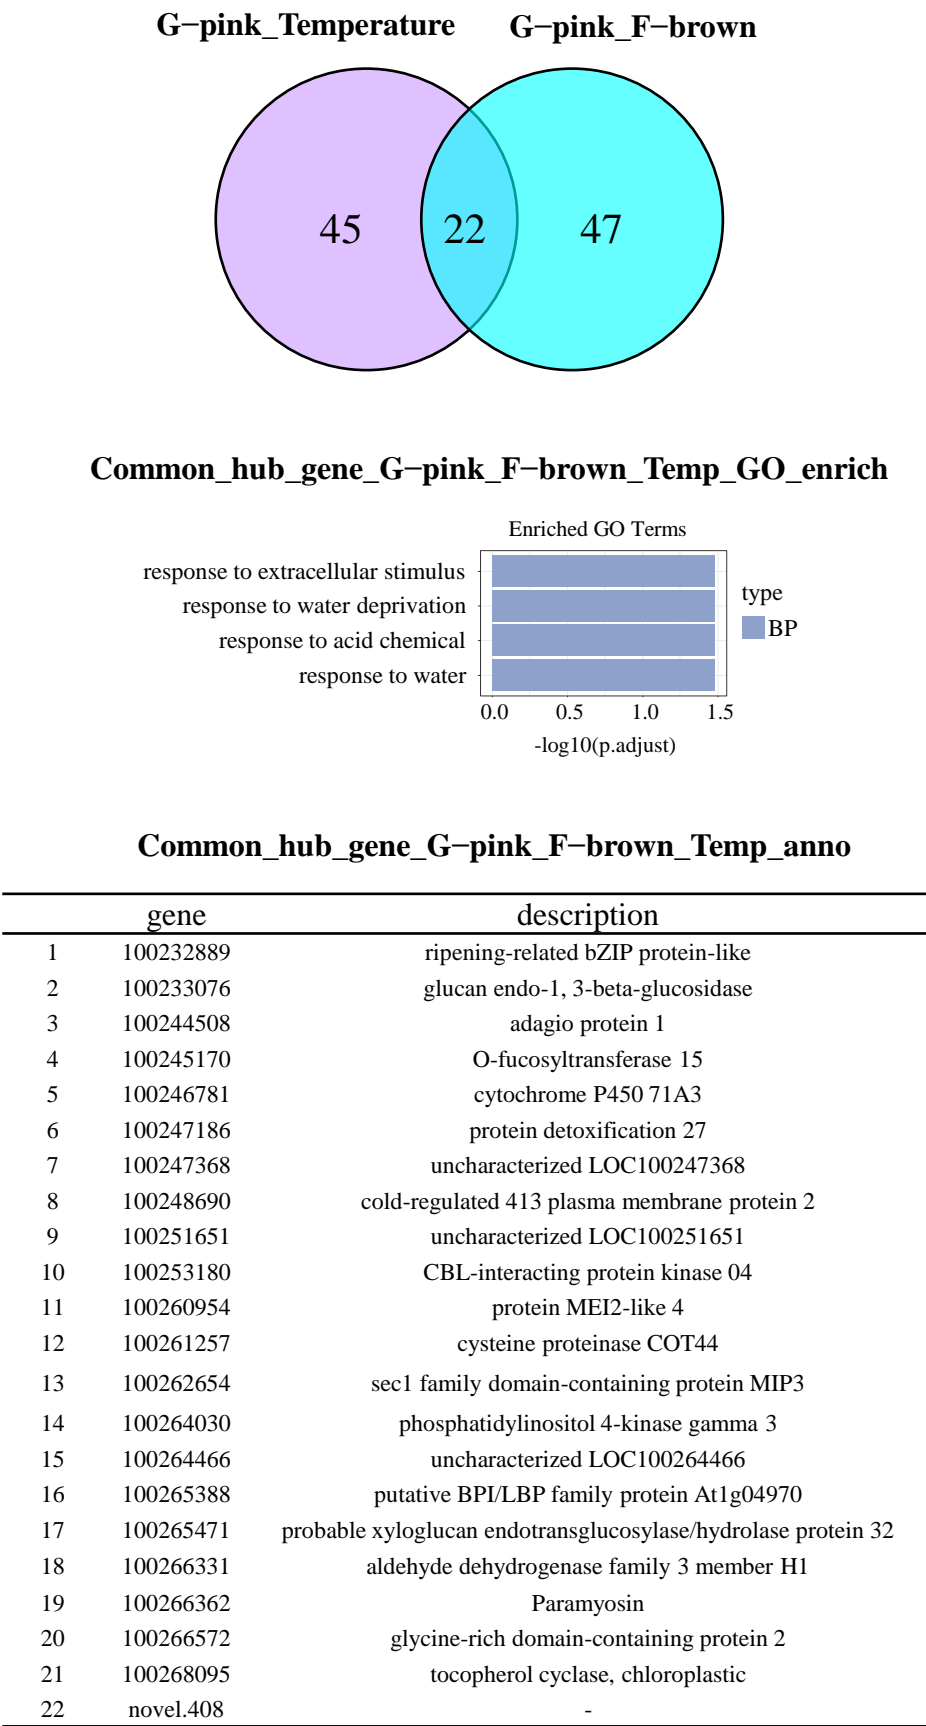



Fig. S3 Gene Ontology analyses of key genes within *L. theobromae* F–brown module that are correlated with grapevine G–pink module and temperature.

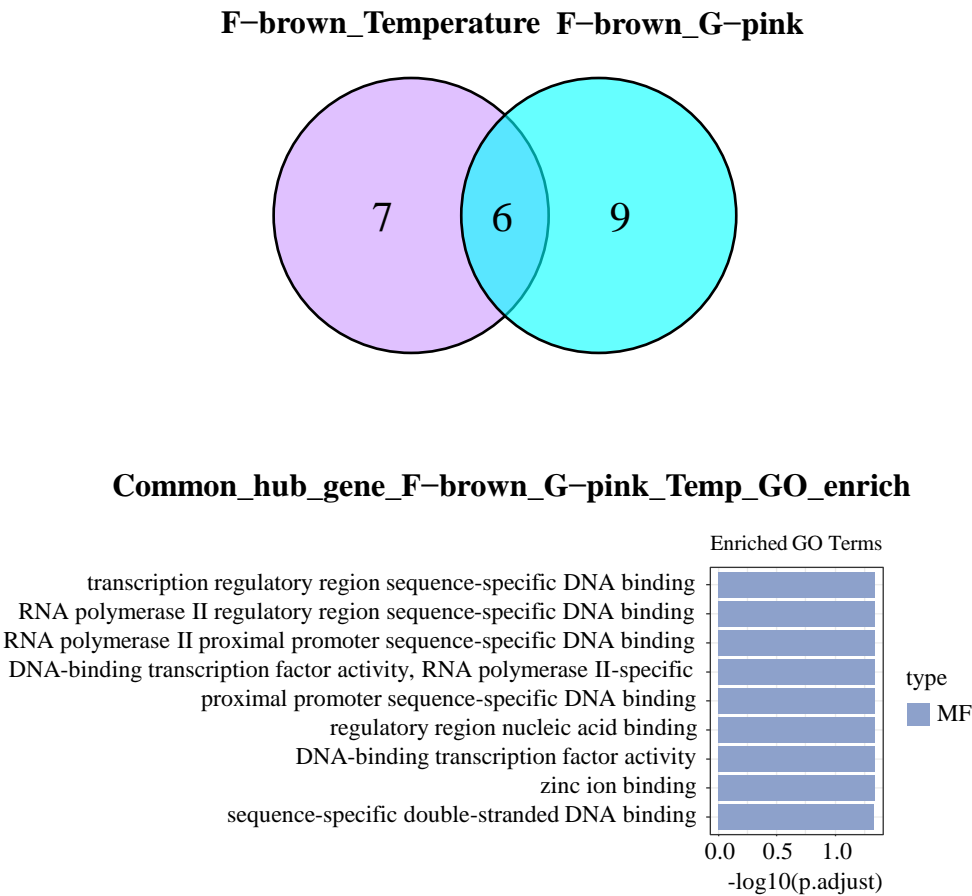

| Common_hub_gene_F–brown_G–pink_Temp_anno |        |                                             |
|------------------------------------------|--------|---------------------------------------------|
|                                          | gene   | description                                 |
| 1                                        | g5563  | Fungal specific transcription factor domain |
| 2                                        | g7634  | O-methyltransferase                         |
| 3                                        | g12383 | ABC transporter protein                     |
| 4                                        | g2437  | Nudix domain protein                        |
| 5                                        | g2480  | NADH: flavin oxidoreductase NADH oxidase    |
| 6                                        | g7286  | Phenylacetyl-ligase                         |

Fig. S4 Gene Ontology analyses of key genes within grapevine G–pink module that are correlated with *L. theobromae* F–red module and temperature.

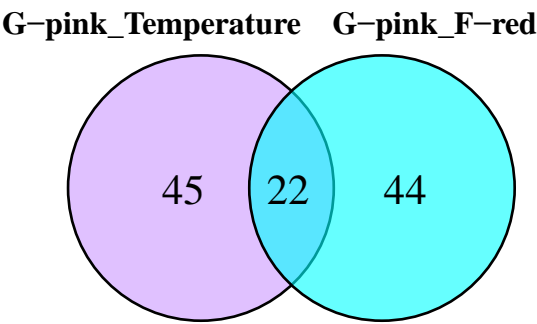

| Common_hub_gene_G–pink_F–red_Temp_anno |           |                                                               |
|----------------------------------------|-----------|---------------------------------------------------------------|
|                                        | gene      | description                                                   |
| 1                                      | 100232889 | ripening-related bZIP protein-like                            |
| 2                                      | 100244508 | adagio protein 1                                              |
| 3                                      | 100246781 | cytochrome P450 71A3                                          |
| 4                                      | 100247186 | protein detoxification 27                                     |
| 5                                      | 100247368 | uncharacterized LOC100247368                                  |
| 6                                      | 100248696 | autophagy-related protein 8i                                  |
| 7                                      | 100253180 | CBL-interacting protein kinase 04                             |
| 8                                      | 100256125 | uncharacterized LOC100256125                                  |
| 9                                      | 100260954 | protein MEI2-like 4                                           |
| 10                                     | 100261030 | protein MEI2-like 4                                           |
| 11                                     | 100262863 | profilin-1                                                    |
| 12                                     | 100262931 | uncharacterized LOC100262931                                  |
| 13                                     | 100264190 | WD repeat-containing protein 44                               |
| 14                                     | 100264466 | uncharacterized LOC100264466                                  |
| 15                                     | 100265471 | probable xyloglucan endotransglucosylase/hydrolase protein 32 |
| 16                                     | 100265815 | vacuolar amino acid transporter 1                             |
| 17                                     | 100266050 | GABA transporter 1                                            |
| 18                                     | 100266130 | box C/D snoRNA protein 1                                      |
| 19                                     | 100266362 | Paramyosin                                                    |
| 20                                     | 100266572 | glycine-rich domain-containing protein 2                      |
| 21                                     | 104877310 | beta-glucosidase 18                                           |
| 22                                     | novel.408 | -                                                             |

Fig. S5 Gene Ontology analyses of key genes within *L. theobromae* F–red module that are correlated with grapevine G–pink module and temperature.

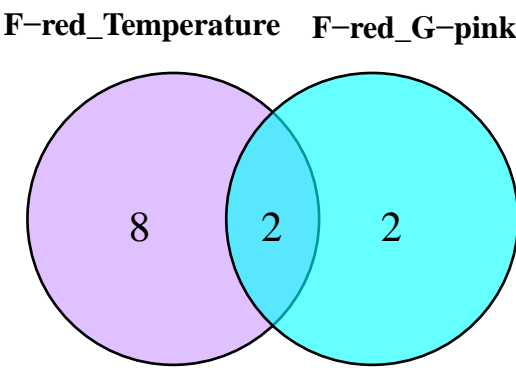

Common\_hub\_gene\_F–red\_G–pink\_Temp\_anno

|   | gene  | description               |
|---|-------|---------------------------|
| 1 | g5330 | GTP cyclohydrolase I      |
| 2 | g9404 | Glutathione S-transferase |

Fig. S6 Gene Ontology analyses of key genes within grapevine G–pink module that are correlated with *L. theobromae* F–darkred module and temperature.

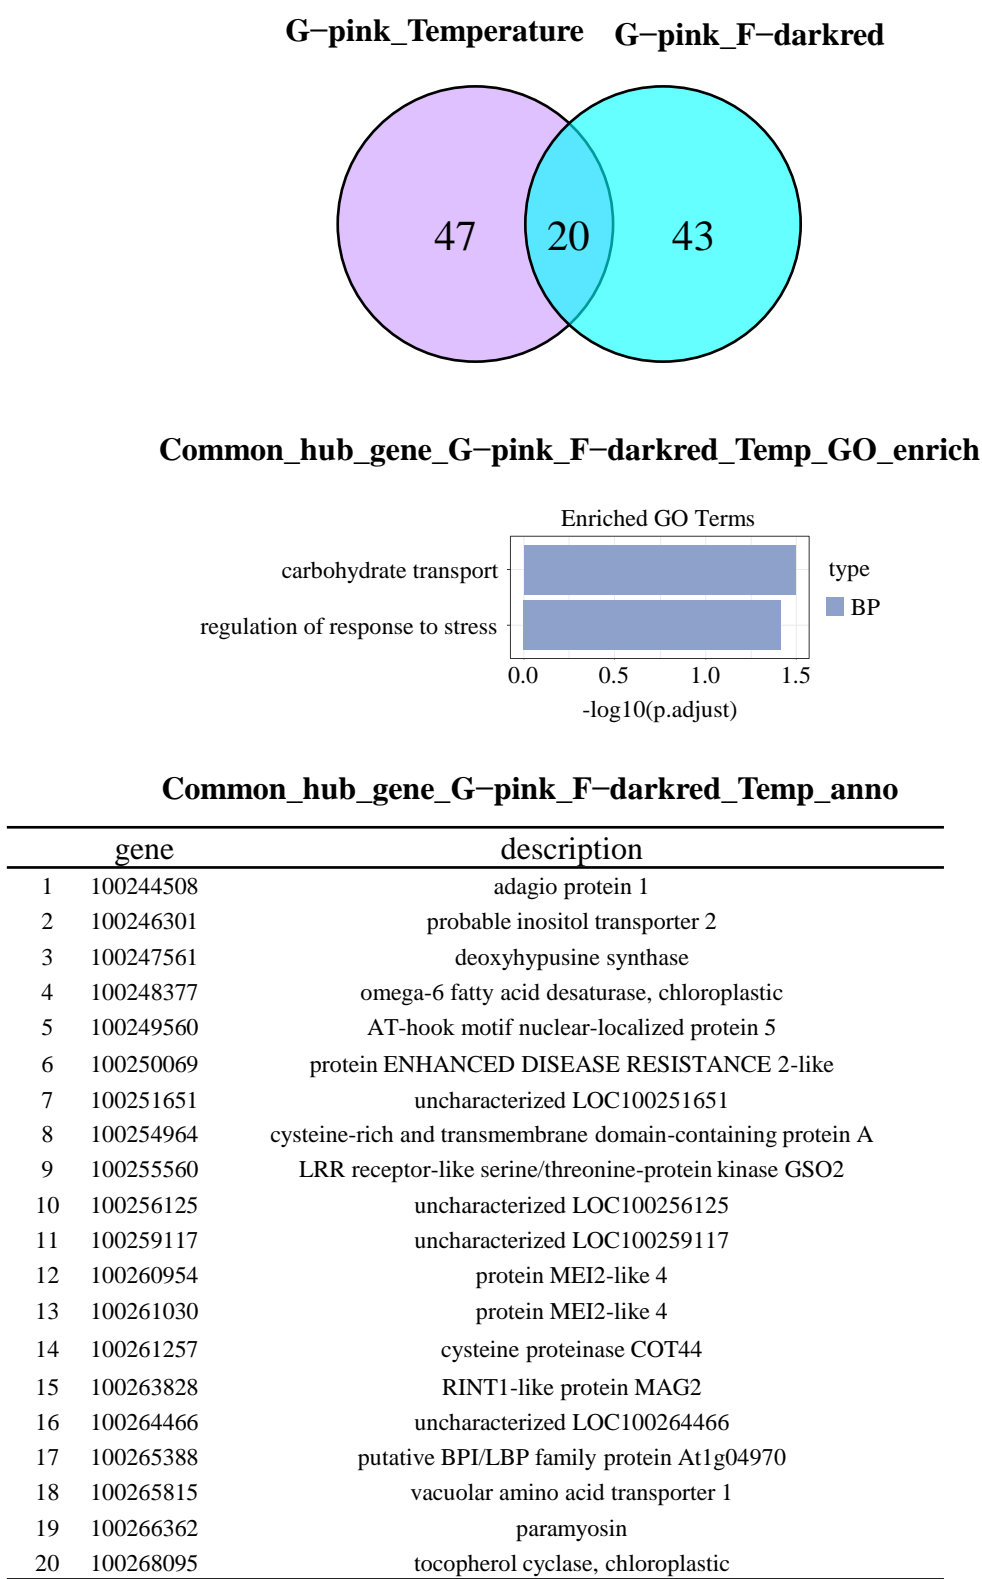

Fig. S7 Gene Ontology analyses of key genes within *L. theobromae* F-darkred module that are correlated with grapevine G-pink module and temperature.

F-darkred\_Temperature F-darkred\_G-pink

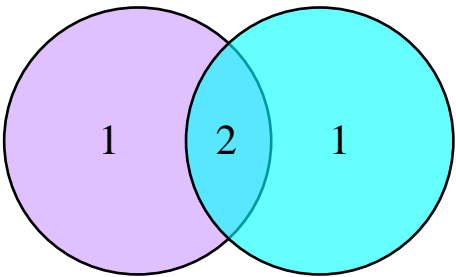

Common\_hub\_gene\_F-darkred\_G-pink\_Temp\_GO\_enrich

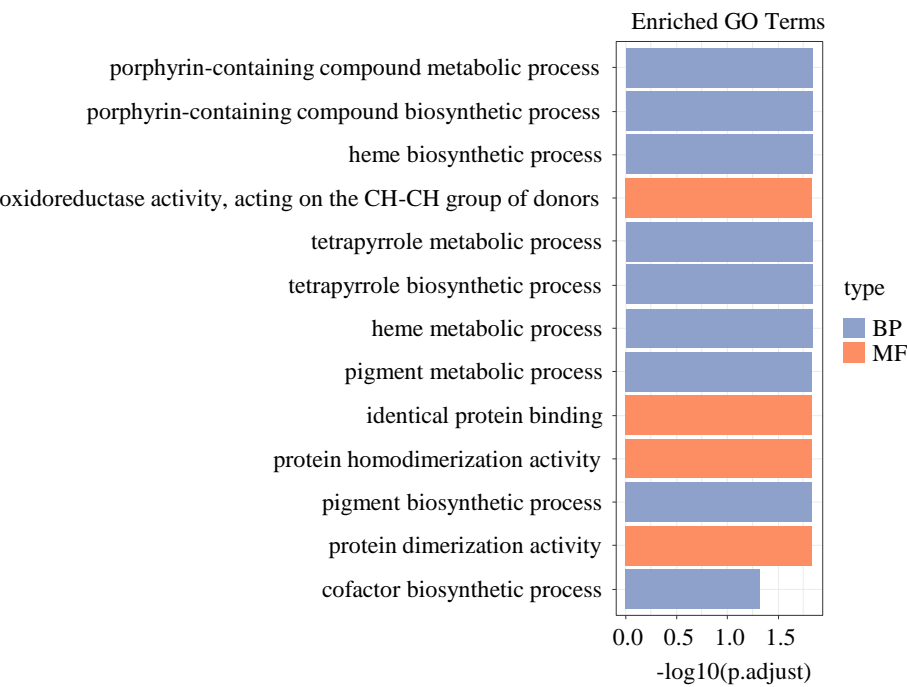

Common\_hub\_gene\_F-darkred\_G-pink\_Temp\_anno

|   | gene  | Description                            |
|---|-------|----------------------------------------|
| 1 | g6235 | NA                                     |
| 2 | g6412 | Coproporphyrinogen III oxidase protein |

Fig. S8 Gene Ontology analyses of key genes within grapevine G-blue module that are correlated with *L. theobromae* F-red module and temperature.

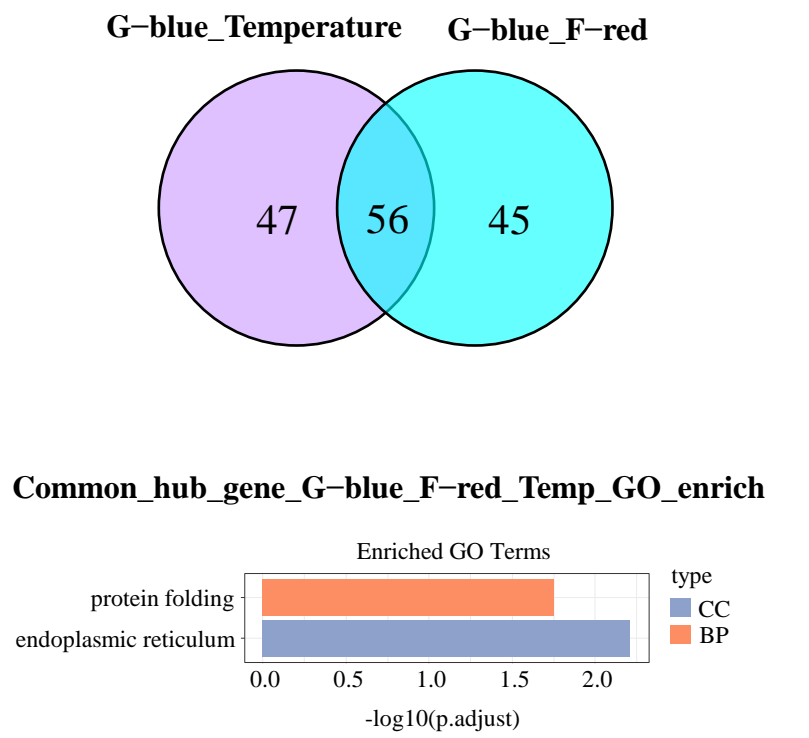



# Common\_hub\_gene\_G-blue\_F-red\_Temp\_anno

|    | gene      | description                                                                 |
|----|-----------|-----------------------------------------------------------------------------|
| 1  | 100241091 | nudix hydrolase 14, chloroplastic-like                                      |
| 2  | 100241158 | 60S ribosomal protein L32-1                                                 |
| 3  | 100241169 | putative ALA-interacting subunit 2                                          |
| 4  | 100241270 | putative pentatricopeptide repeat-containing protein At1g09680              |
| 5  | 100242205 | protein POLLEN DEFECTIVE IN GUIDANCE 1                                      |
| 6  | 100243115 | protein translation factor SUI1 homolog 1                                   |
| 7  | 100243120 | protein disulfide isomerase-like 2-3                                        |
| 8  | 100243248 | transcription factor RF2b                                                   |
| 9  | 100244643 | 14-3-3-like protein B                                                       |
| 10 | 100246124 | probable pectate lyase 12-like                                              |
| 11 | 100246648 | RNA-binding protein 42                                                      |
| 12 | 100247016 | uncharacterized protein At1g04910                                           |
| 13 | 100247365 | GTP-binding nuclear protein Ran-3                                           |
| 14 | 100248135 | calcyclin-binding protein                                                   |
| 15 | 100248504 | PRA1 family protein E                                                       |
| 16 | 100248687 | 2-hydroxyisoflavanone dehydratase                                           |
| 17 | 100248914 | chaperone protein DnaJ                                                      |
| 18 | 100249097 | peptidyl-prolyl cis-trans isomerase FKBP62                                  |
| 19 | 100249249 | multiprotein-bridging factor 1c                                             |
| 20 | 100249262 | uncharacterized LOC100249262                                                |
| 21 | 100249761 | uncharacterized protein YwbO                                                |
| 22 | 100250042 | non-specific lipid-transfer protein-like                                    |
| 23 | 100250368 | FAD synthase                                                                |
| 24 | 100250629 | selenoprotein K-like                                                        |
| 25 | 100251534 | probable inactive ATP-dependent zinc metalloprotease FTSHI 2, chloroplastic |
| 26 | 100252105 | dnaJ protein ERDJ3B                                                         |
| 27 | 100252468 | bifunctional purple acid phosphatase 26                                     |
| 28 | 100252886 | purple acid phosphatase 23                                                  |
| 29 | 100253897 | vesicle-associated protein 1-3                                              |
| 30 | 100254197 | protein GIGANTEA                                                            |
| 31 | 100254521 | probable glutathione S-transferase                                          |
| 32 | 100254890 | ultraviolet-B receptor UVR8                                                 |
| 33 | 100255072 | OVARIAN TUMOR DOMAIN-containing deubiquitinating enzyme 12                  |
| 34 | 100255485 | galactinol synthase 1                                                       |
| 35 | 100255655 | F-box protein SKIP23-like                                                   |
| 36 | 100255660 | uncharacterized LOC100255660                                                |
| 37 | 100257397 | co-chaperone protein p23-1                                                  |
| 38 | 100258175 | uncharacterized LOC100258175                                                |
| 39 | 100258274 | probable plastid-lipid-associated protein 4, chloroplastic                  |
| 40 | 100258986 | peptidyl-prolyl cis-trans isomerase CYP37, chloroplastic                    |
| 41 | 100259138 | protein disulfide-isomerase                                                 |
| 42 | 100259634 | histone acetyltransferase MCC1                                              |
| 43 | 100261774 | uncharacterized LOC100261774                                                |
| 44 | 100262037 | putative pentatricopeptide repeat-containing protein At3g23330              |
| 45 | 100262887 | chromatin modification-related protein EAF7                                 |
| 46 | 100266654 | peptidyl-prolyl cis-trans isomerase FKBP62                                  |
| 47 | 100266884 | uncharacterized LOC100266884                                                |
| 48 | 100267648 | endoplasmin homolog                                                         |
| 49 | 100852521 | carnosine N-methyltransferase                                               |
| 50 | 100853585 | pentatricopeptide repeat-containing protein At4g17616                       |
| 51 | 100853980 | putative disease resistance RPP13-like protein 1                            |
| 52 | 104878259 | peptidyl-prolyl cis-trans isomerase FKBP65                                  |
| 53 | 104880050 | uncharacterized LOC104880050                                                |
| 54 | 104880245 | uncharacterized LOC104880245                                                |
| 55 | 104881877 | uncharacterized LOC104881877                                                |
| 56 | novel.547 | PF16594: Putative AtpZ or ATP-synthase-associated                           |

Fig. S9 Gene Ontology analyses of key genes within *L. theobromae* F–red module that are correlated with grapevine G–blue module and temperature.

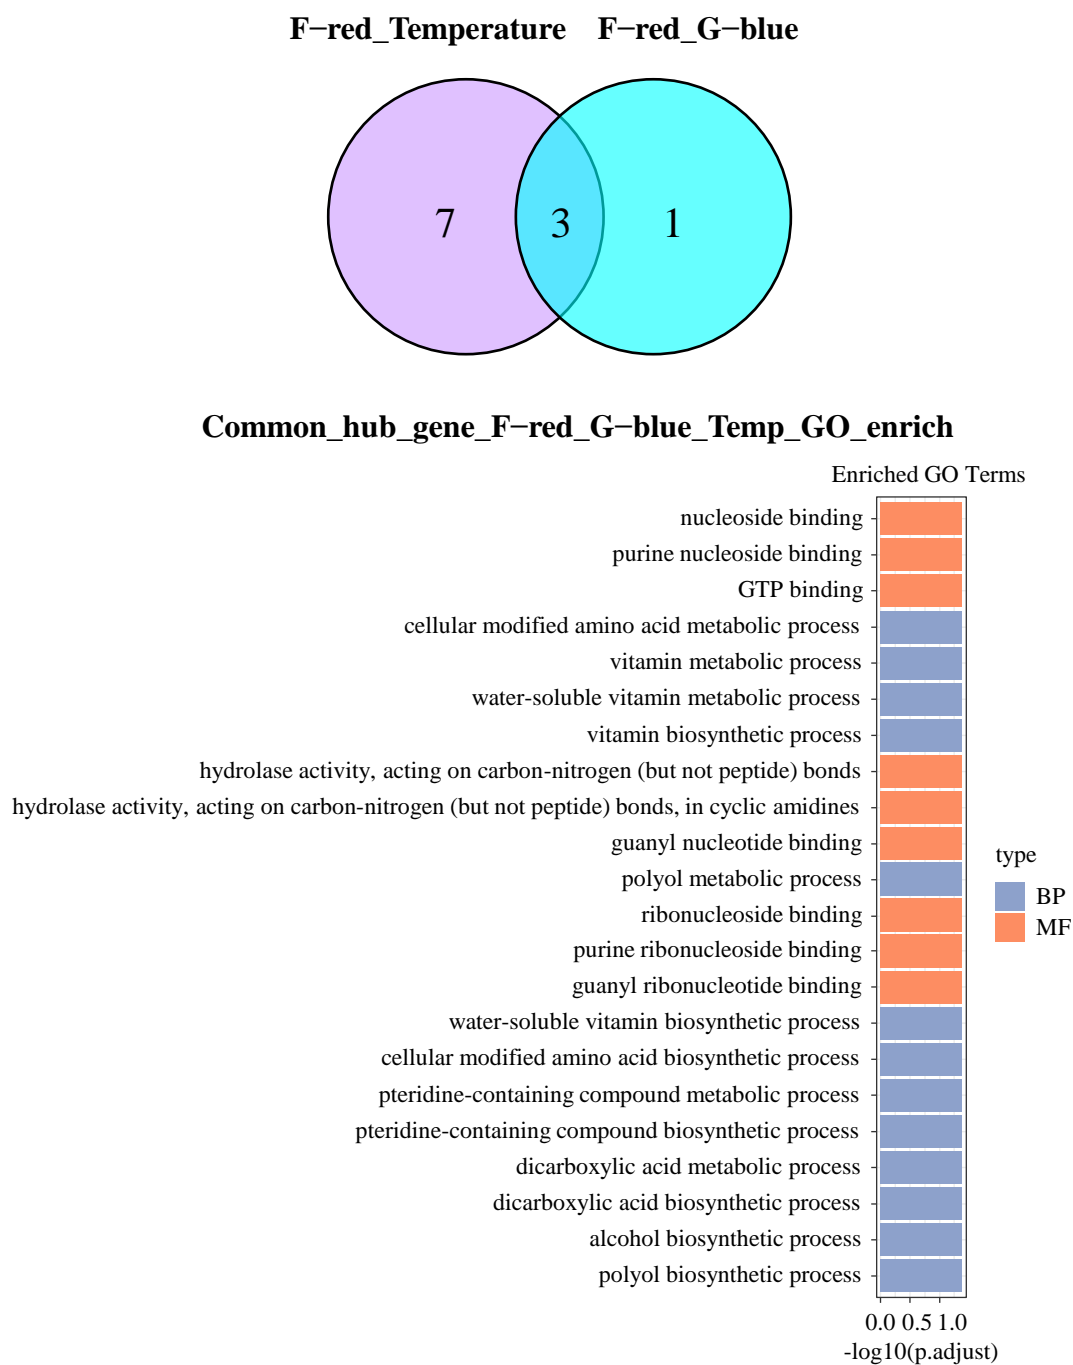

| Common_hub_gene_F–red_G–blue_Temp_anno |       |                           |
|----------------------------------------|-------|---------------------------|
|                                        | gene  | description               |
| 1                                      | g5330 | GTP cyclohydrolase I      |
| 2                                      | g9404 | Glutathione S-transferase |
| 3                                      | g9410 | NA                        |

Fig. S10 Gene Ontology analyses of key genes within grapevine G–blue module that are correlated with *L. theobromae* F–brown module and temperature.

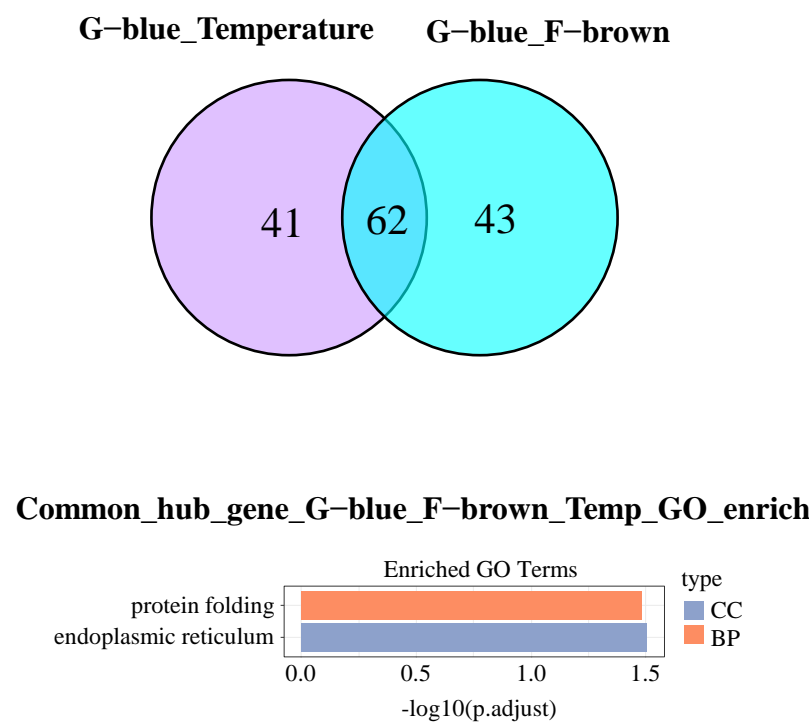

# Common\_hub\_gene\_G-blue\_F-brown\_Temp\_anno

|    | gene      | description                                                                 |
|----|-----------|-----------------------------------------------------------------------------|
| 1  | 100241091 | nudix hydrolase 14, chloroplastic-like                                      |
| 2  | 100241158 | 60S ribosomal protein L32-1                                                 |
| 3  | 100241169 | putative ALA-interacting subunit 2                                          |
| 4  | 100241270 | putative pentatricopeptide repeat-containing protein At1g09680              |
| 5  | 100242205 | protein POLLEN DEFECTIVE IN GUIDANCE 1                                      |
| 6  | 100242699 | cysteine-rich receptor-like protein kinase 10                               |
| 7  | 100243115 | protein translation factor SUI1 homolog 1                                   |
| 8  | 100243120 | protein disulfide isomerase-like 2-3                                        |
| 9  | 100244534 | charged multivesicular body protein 5                                       |
| 10 | 100244643 | 14-3-3-like protein B                                                       |
| 11 | 100245010 | gibberellin 2-beta-dioxygenase 1                                            |
| 12 | 100246124 | probable pectate lyase 12-like                                              |
| 13 | 100247016 | uncharacterized protein At1g04910                                           |
| 14 | 100247365 | GTP-binding nuclear protein Ran-3                                           |
| 15 | 100248135 | calyculin-binding protein                                                   |
| 16 | 100248504 | PRA1 family protein E                                                       |
| 17 | 100248687 | 2-hydroxyisoflavanone dehydratase                                           |
| 18 | 100248914 | chaperone protein DnaJ                                                      |
| 19 | 100249097 | peptidyl-prolyl cis-trans isomerase FKBP62                                  |
| 20 | 100249249 | multiprotein-bridging factor 1c                                             |
| 21 | 100249262 | uncharacterized LOC100249262                                                |
| 22 | 100249761 | uncharacterized protein YwbO                                                |
| 23 | 100250042 | non-specific lipid-transfer protein-like                                    |
| 24 | 100250368 | FAD synthase                                                                |
| 25 | 100250629 | selenoprotein K-like                                                        |
| 26 | 100251534 | probable inactive ATP-dependent zinc metalloprotease FTSHI 2, chloroplastic |
| 27 | 100251783 | transcription repressor MYB6                                                |
| 28 | 100252105 | dnaJ protein ERDJ3B                                                         |
| 29 | 100252468 | bifunctional purple acid phosphatase 26                                     |
| 30 | 100252886 | purple acid phosphatase 23                                                  |
| 31 | 100253622 | multiple inositol polyphosphate phosphatase 1                               |
| 32 | 100253897 | vesicle-associated protein 1-3                                              |
| 33 | 100254197 | protein GIGANTEA                                                            |
| 34 | 100254521 | probable glutathione S-transferase                                          |
| 35 | 100254890 | ultraviolet-B receptor UVR8                                                 |
| 36 | 100255485 | galactinol synthase 1                                                       |
| 37 | 100255655 | F-box protein SKIP23-like                                                   |
| 38 | 100255660 | uncharacterized LOC100255660                                                |
| 39 | 100255990 | probable sugar phosphate/phosphate translocator At4g32390                   |
| 40 | 100258175 | uncharacterized LOC100258175                                                |
| 41 | 100258274 | probable plastid-lipid-associated protein 4, chloroplastic                  |
| 42 | 100258986 | peptidyl-prolyl cis-trans isomerase CYP37, chloroplastic                    |
| 43 | 100259138 | protein disulfide-isomerase                                                 |
| 44 | 100259634 | histone acetyltransferase MCC1                                              |
| 45 | 100259801 | tetratricopeptide repeat protein SKI3                                       |
| 46 | 100260651 | purple acid phosphatase                                                     |
| 47 | 100261742 | fanconi-associated nuclease 1 homolog                                       |
| 48 | 100261774 | uncharacterized LOC100261774                                                |
| 49 | 100261821 | uncharacterized LOC100261821                                                |
| 50 | 100262037 | putative pentatricopeptide repeat-containing protein At3g23330              |
| 51 | 100262887 | chromatin modification-related protein EAF7                                 |
| 52 | 100263126 | DNA polymerase zeta catalytic subunit                                       |
| 53 | 100266409 | mediator of RNA polymerase II transcription subunit 17                      |
| 54 | 100266654 | peptidyl-prolyl cis-trans isomerase FKBP62                                  |
| 55 | 100266884 | uncharacterized LOC100266884                                                |
| 56 | 100267648 | endoplasmic homolog                                                         |
| 57 | 100853585 | pentatricopeptide repeat-containing protein At4g17616                       |
| 58 | 100853980 | putative disease resistance RPP13-like protein 1                            |
| 59 | 100854999 | multiprotein-bridging factor 1a                                             |
| 60 | 104880245 | uncharacterized LOC104880245                                                |
| 61 | 104880500 | uncharacterized LOC104880500                                                |
| 62 | 104881877 | uncharacterized LOC104881877                                                |

Fig. S11 Gene Ontology analyses of key genes within *L. theobromae* F–brown module that are correlated with grapevine G–blue module and temperature.

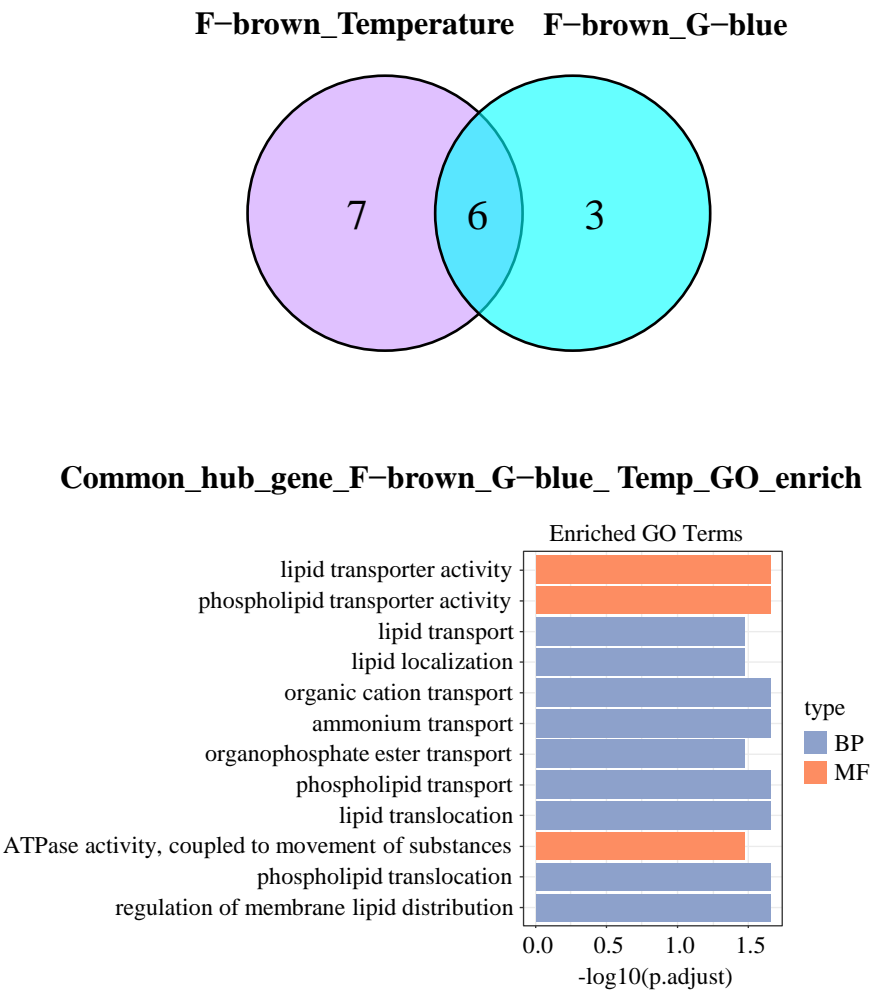

| Common_hub_gene_F–brown_G–blue_Temp_anno |        |                                         |
|------------------------------------------|--------|-----------------------------------------|
|                                          | gene   | description                             |
| 1                                        | g11115 | Rta1 domain protein                     |
| 2                                        | g12383 | ABC transporter protein                 |
| 3                                        | g2437  | Nudix domain protein                    |
| 4                                        | g2480  | NADH:flavin oxidoreductase NADH oxidase |
| 5                                        | g7286  | Phenylacetyl-ligase                     |
| 6                                        | g7634  | Catechol O-methyltransferase            |



Fig. S12 Gene Ontology analyses of key genes within grapevine G-salmon module that are correlated with *L. theobromae* F-red module and temperature.

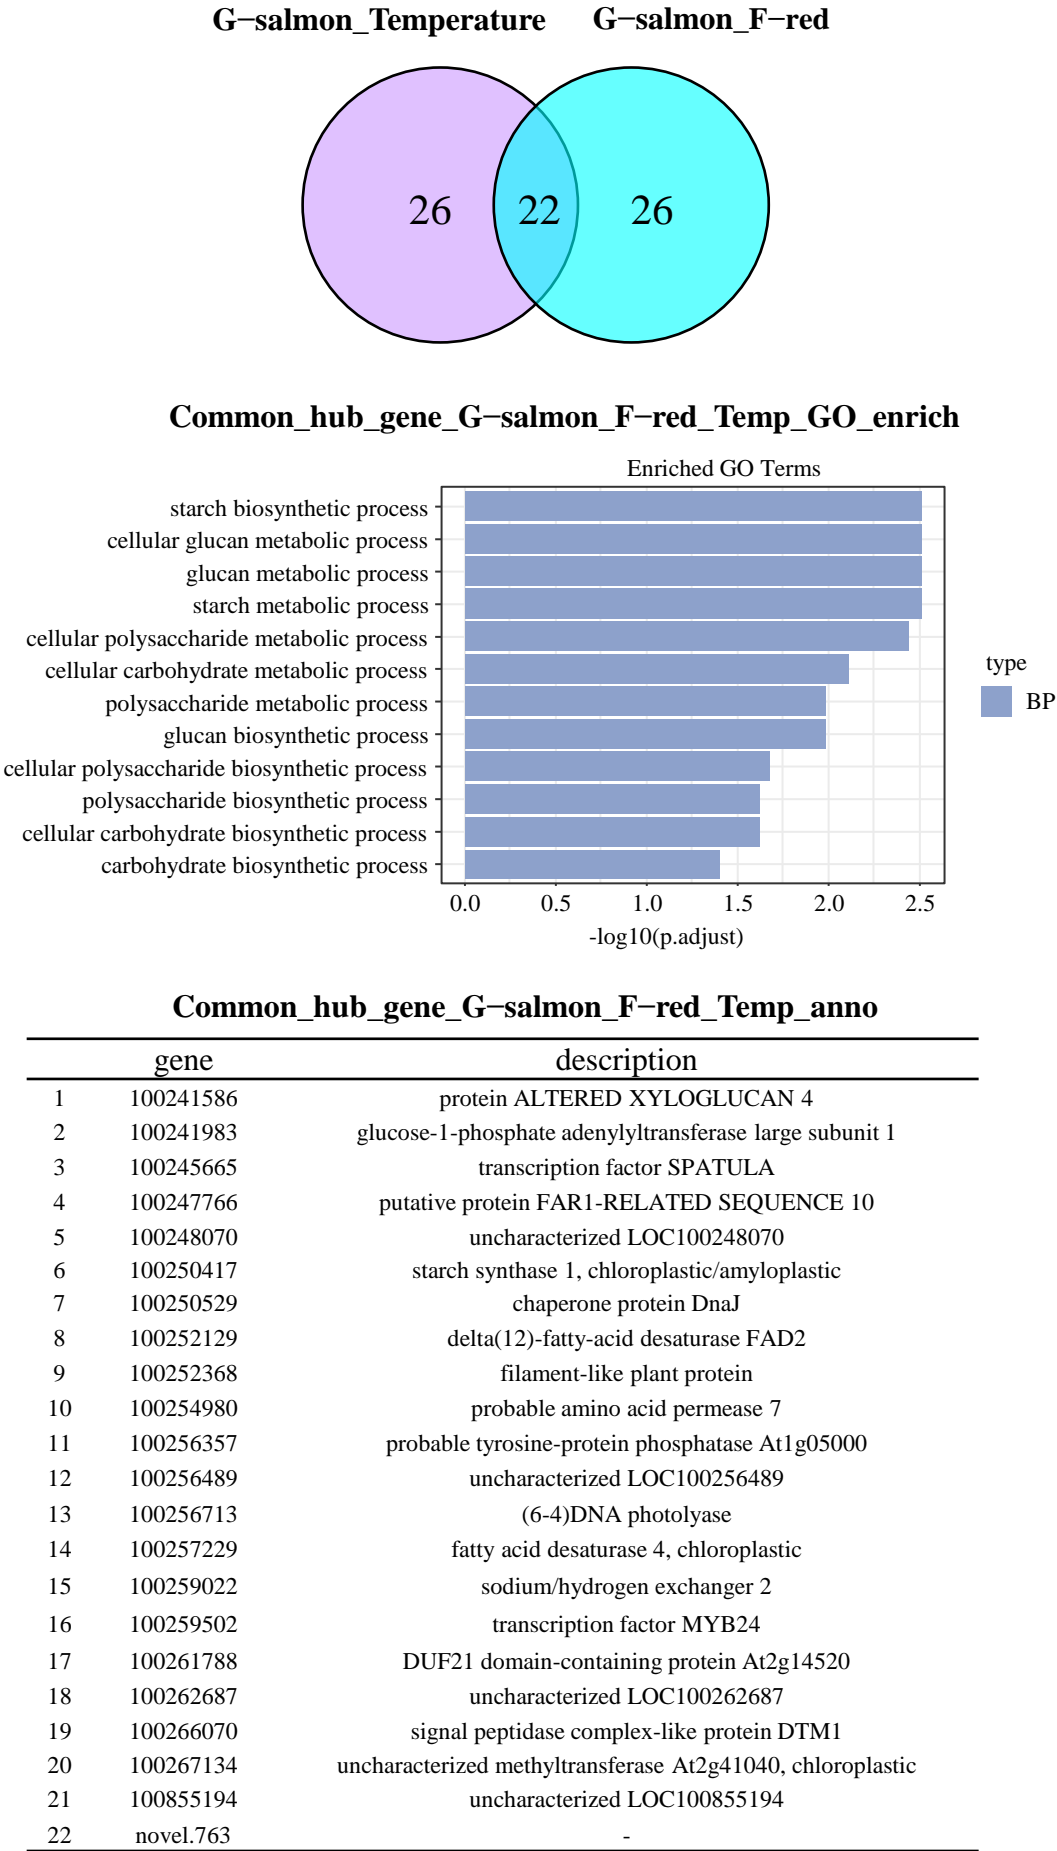

Fig. S13 Gene Ontology analyses of key genes within *L. theobromae* F-red module that are correlated with grapevine G-salmon module and temperature.

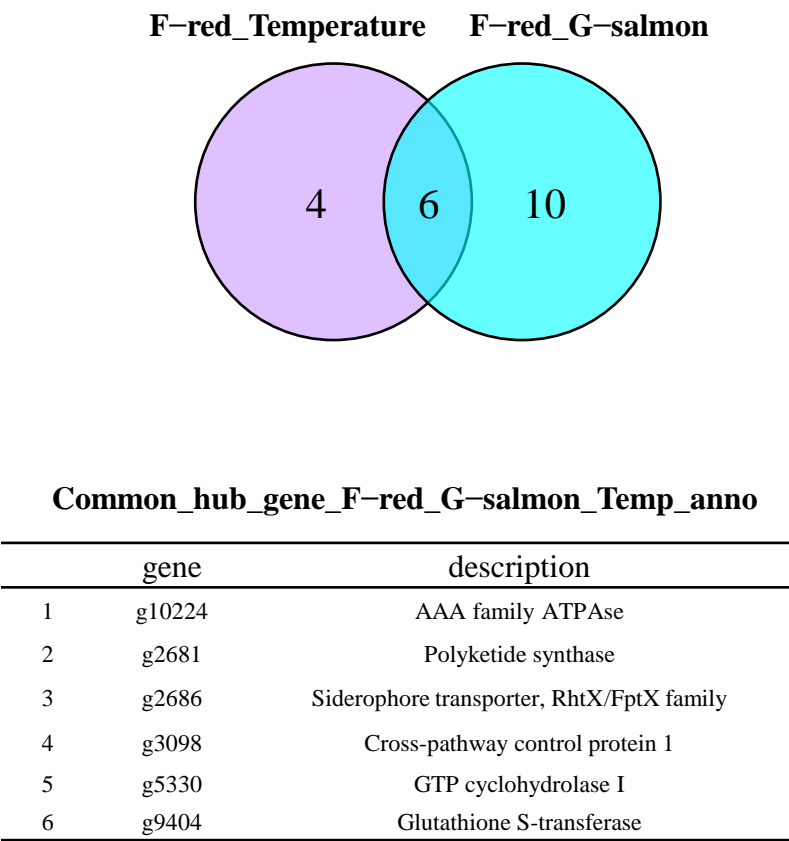

Fig. S14 Gene Ontology analyses of key genes within grapevine G–salmon module that are correlated with *L. theobromae* F–brown and temperature.

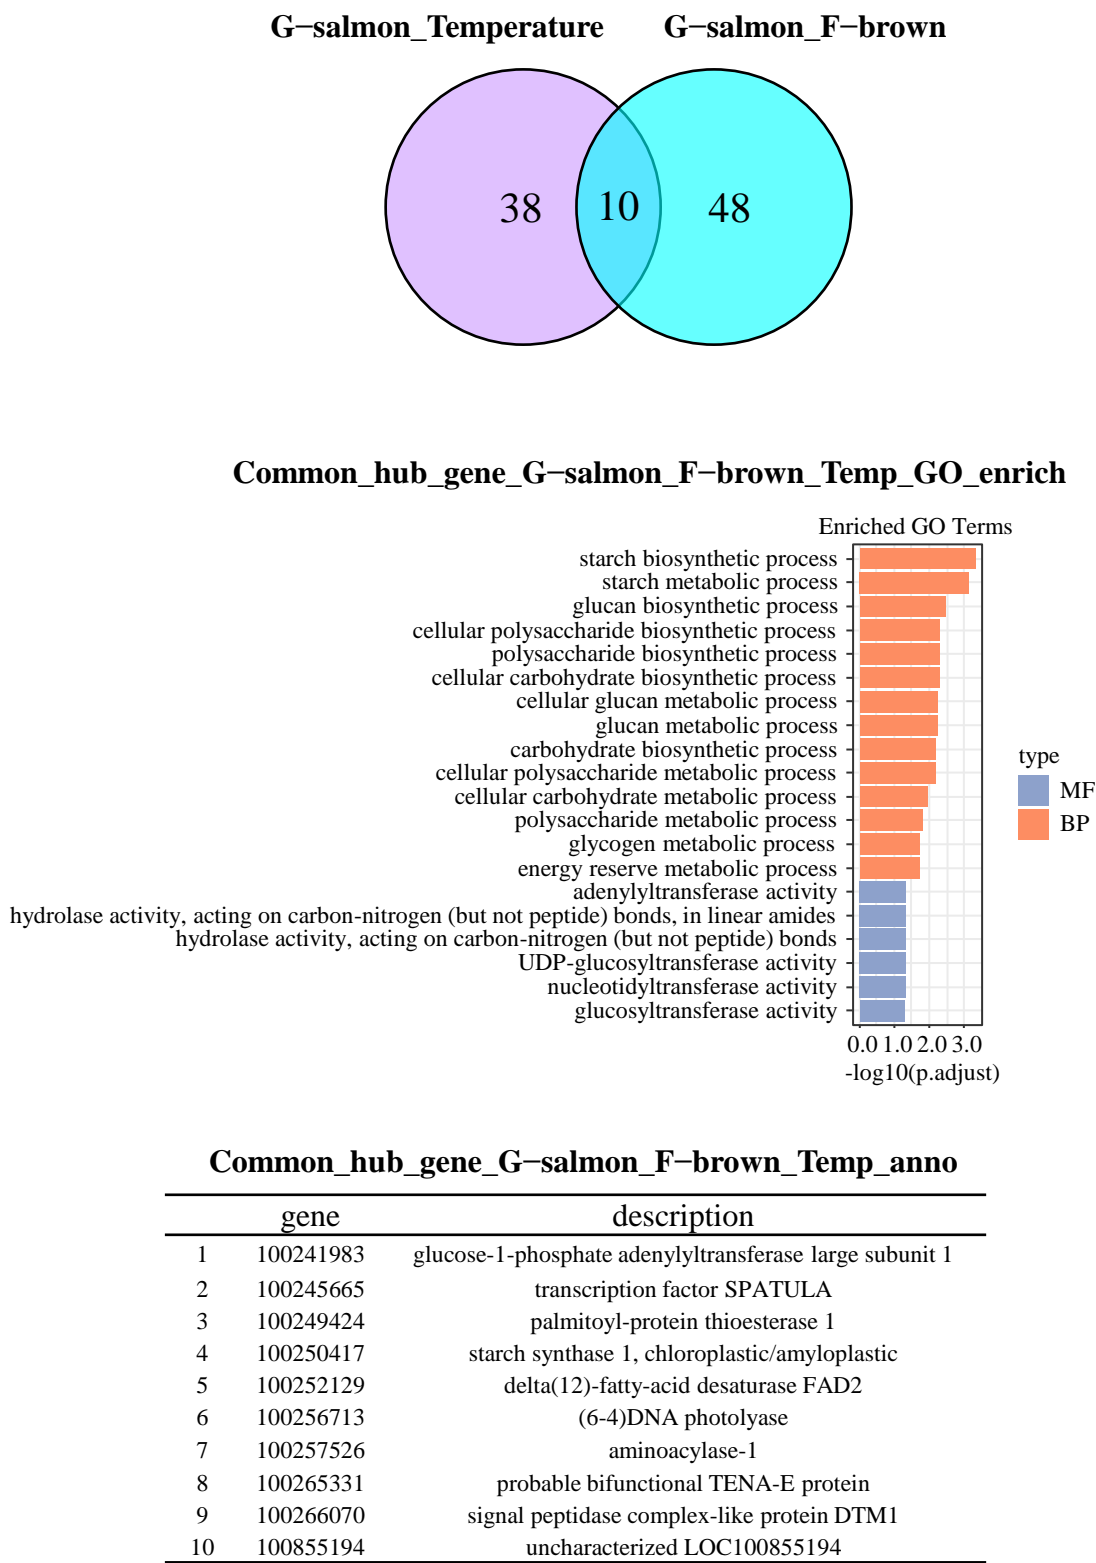

Fig. S15 Gene Ontology analyses of key genes within *L. theobromae* F–brown module that are correlated with grapevine G–salmon module and temperature.

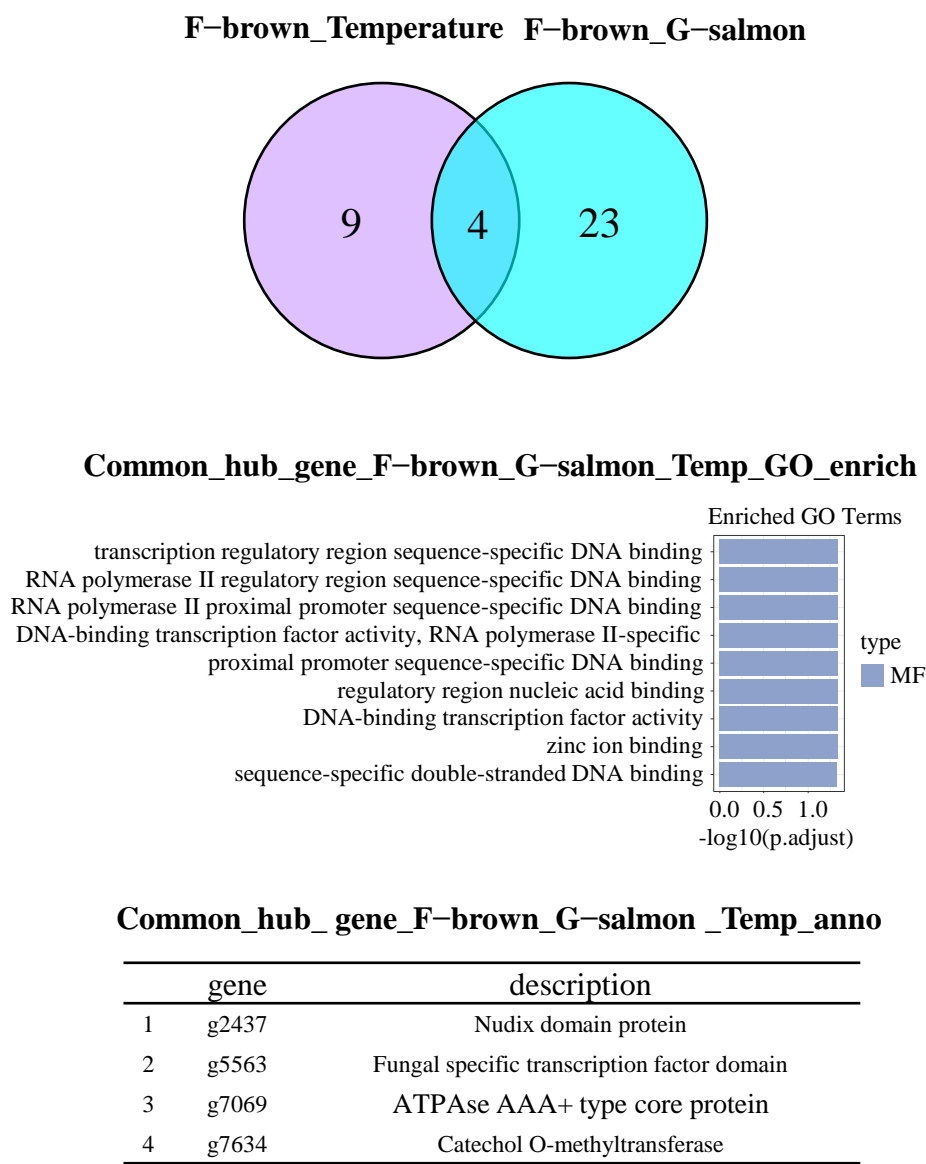

Fig. S16 Gene Ontology analyses of key genes within grapevine G-salmon module that are correlated with *L. theobromae* F-darkred module and temperature

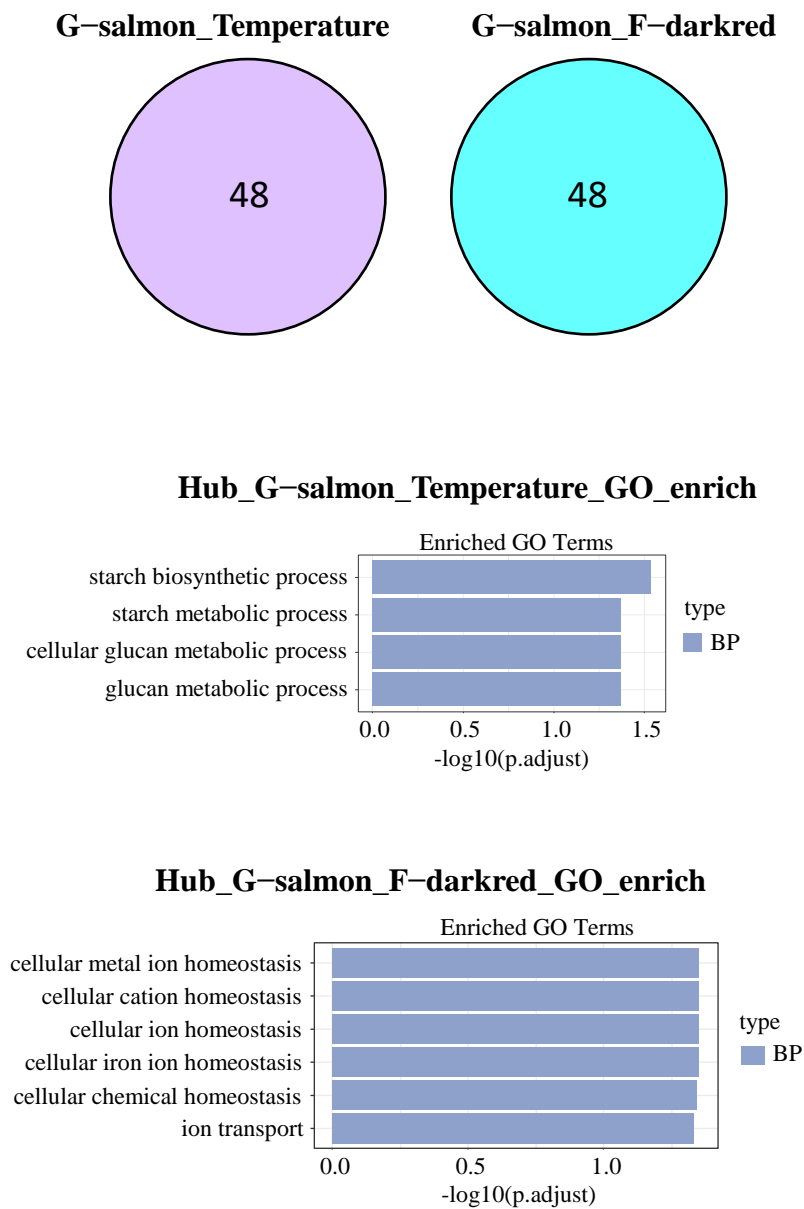



Fig. S17 Gene Ontology analyses of key genes within *L. theobromae* F–darkred module that are correlated with grapevine G–salmon module and temperature.

F–darkred\_Temperature F–darkred\_G–salmon

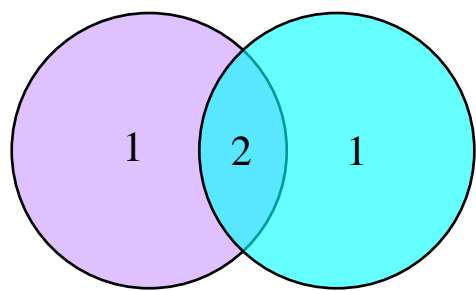

Common\_hub\_gene\_F–darkred\_G–salmon\_Temp\_GO\_enrich

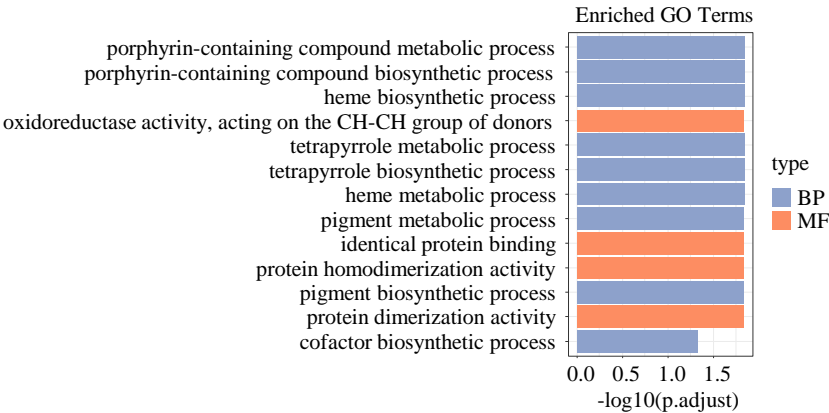

Common\_hub\_gene\_F–darkred\_G–salmon\_Temp\_anno

|   | gene  | description                            |
|---|-------|----------------------------------------|
| 1 | g6235 | NA                                     |
| 2 | g6412 | Coproporphyrinogen III oxidase protein |

Fig. S18 Gene Ontology analyses of key genes within grapevine G–green module that are correlated with *L. theobromae* F–brown module and temperature.

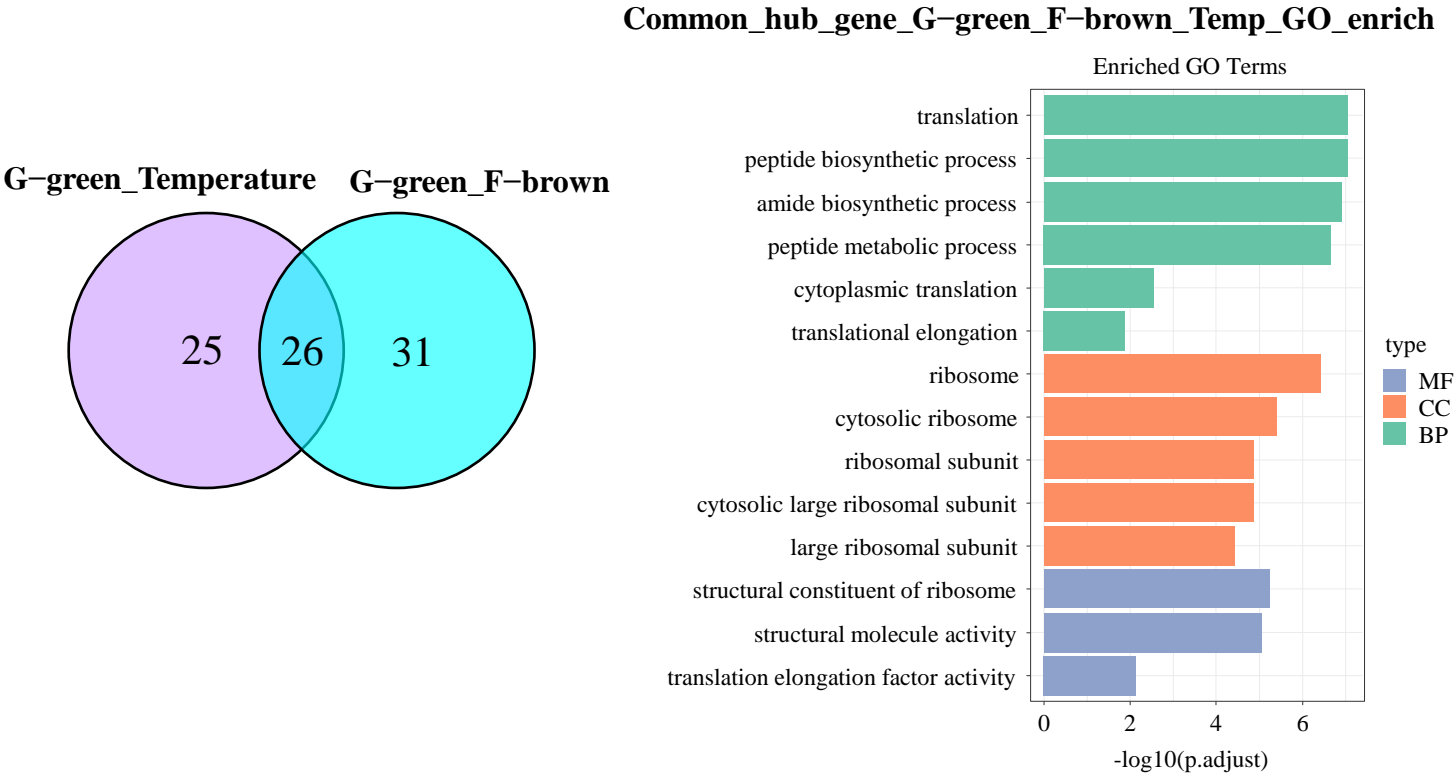

Fig. S19 Gene Ontology analyses of key genes within *L. theobromae* F–brown module that are correlated with grapevine G–green module and temperature.

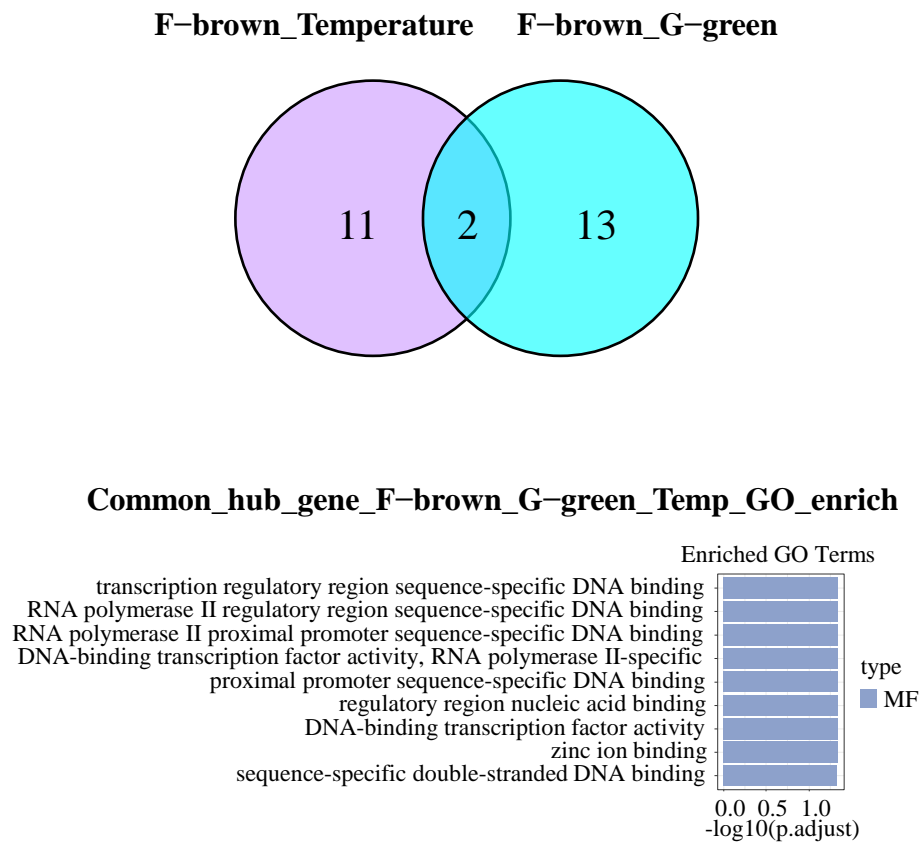

**Common\_hub\_gene\_F–brown\_G–green\_Temp\_anno**

|   | gene  | description                                 |
|---|-------|---------------------------------------------|
| 1 | g4867 | NA                                          |
| 2 | g5563 | Fungal specific transcription factor domain |

Fig. S20 Gene Ontology analyses of key genes within grapevine G–green module that are correlated with *L. theobromae* F–darkred module and temperature.

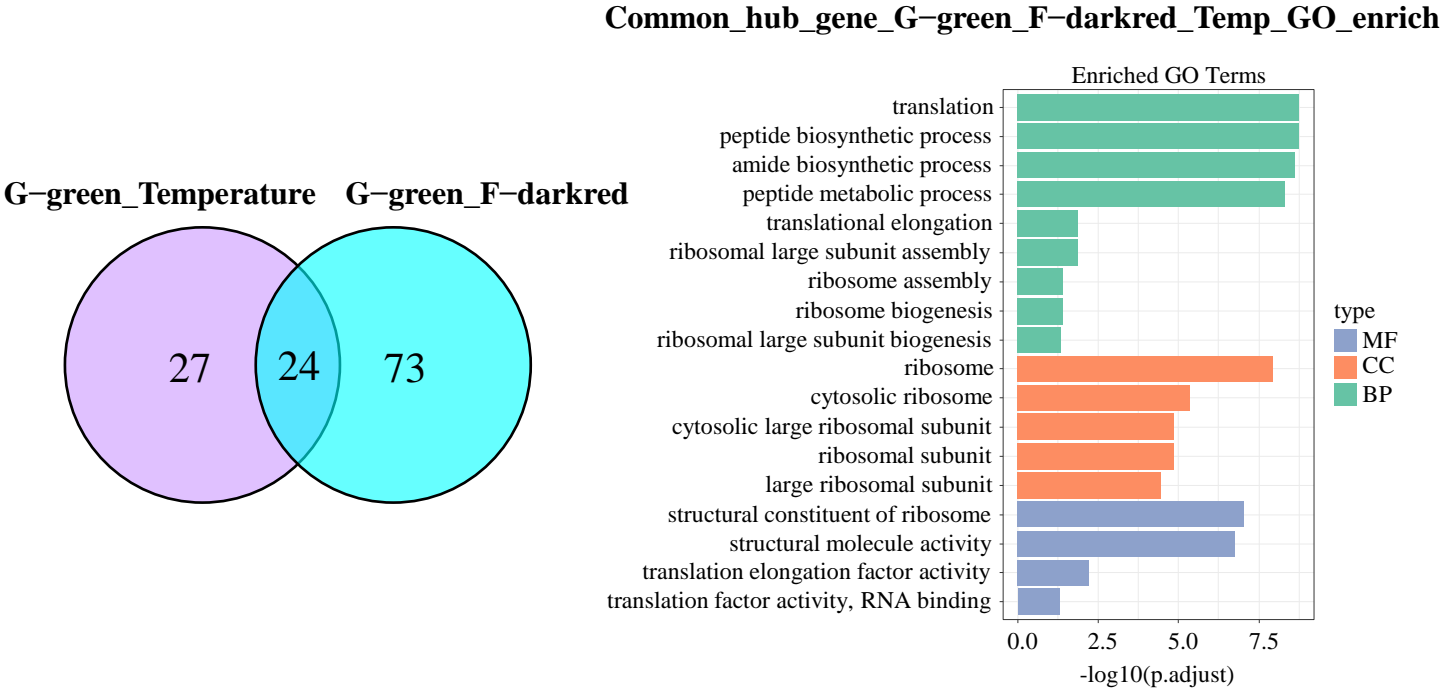

Common\_hub\_gene\_G–green\_F–darkred\_Temp\_anno

|    | gene      | gene_description                              |
|----|-----------|-----------------------------------------------|
| 1  | 100244384 | 60S ribosomal protein L12-like                |
| 2  | 100248037 | 40S ribosomal protein S27-2                   |
| 3  | 100248134 | ABC transporter G family member 29            |
| 4  | 100248907 | E3 ubiquitin ligase BIG BROTHER-related       |
| 5  | 100249575 | T-complex protein 1 subunit alpha             |
| 6  | 100251414 | cytochrome c oxidase assembly protein COX15   |
| 7  | 100251464 | 60S ribosomal protein L11-1                   |
| 8  | 100251538 | -                                             |
| 9  | 100251826 | 60S ribosomal protein L4                      |
| 10 | 100252524 | elongation factor 1-delta                     |
| 11 | 100252536 | 40S ribosomal protein S7                      |
| 12 | 100254719 | 60S ribosomal protein L23a                    |
| 13 | 100255682 | T-complex protein 1 subunit epsilon           |
| 14 | 100257178 | 40S ribosomal protein S8                      |
| 15 | 100260208 | 60S ribosomal protein L14-1                   |
| 16 | 100260533 | 60S ribosomal protein L3                      |
| 17 | 100261522 | elongation factor 1-beta 1                    |
| 18 | 100261817 | 60S ribosomal protein L28-2                   |
| 19 | 100262608 | 60S ribosomal protein L17-2                   |
| 20 | 100262686 | 40S ribosomal protein S4-3                    |
| 21 | 100265608 | uncharacterized protein DDB_G0288133          |
| 22 | 100266487 | 60S ribosomal protein L10a-1                  |
| 23 | 100852874 | eukaryotic translation initiation factor 5A-2 |
| 24 | 109121414 | AB hydrolase superfamily protein YfhM-like    |

Fig. S21 Gene Ontology analyses of key genes within *L. theobromae* F–darkred module that are correlated with grapevine G–green module and temperature.

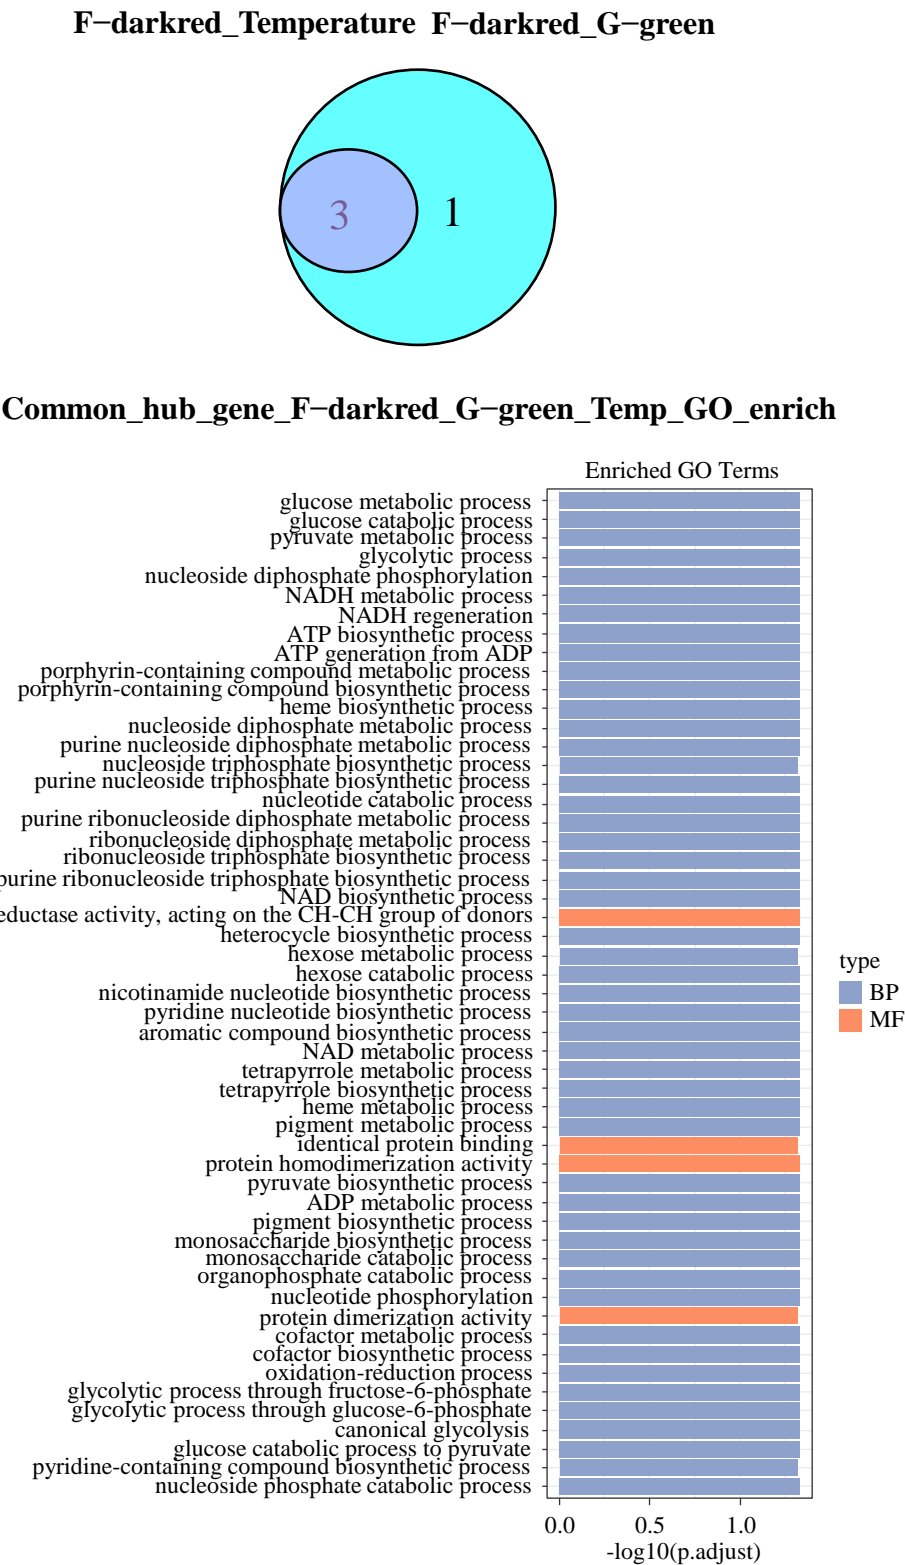

| Common_hub_gene_F-darkred_G-green_Temp_anno |       |                                        |
|---------------------------------------------|-------|----------------------------------------|
|                                             | gene  | description                            |
| 1                                           | g3337 | Phosphoglycerate kinase                |
| 2                                           | g6235 | NA                                     |
| 3                                           | g6412 | Coproporphyrinogen III oxidase protein |
