# Supplementary material for: Dual RNA-Seq Reveals Temperature-Mediated Gene Reprogramming and Molecular Crosstalk between Grapevine and Lasiodiplodia theobromae
Source: MDPI journal article supplement (doi:10.3390/jof9121197), 2023-12-14
Supplement: s1 [file s1]

Supplementary Table 4. List of *L. theobromae* temperature-correlated genes found in correlated modules between grapevine and *L. theobromae*.

|   | <i>L. theobromae</i> _module | Grapevine_module | Gene   | Description                                  |
|---|------------------------------|------------------|--------|----------------------------------------------|
| 1 | F-brown                      | G-pink           | g5563  | Fungal specific transcription factor domain  |
| 2 | F-brown                      | G-pink           | g7634  | O-methyltransferase                          |
| 3 | F-brown                      | G-pink           | g12383 | ABC transporter protein                      |
| 4 | F-brown                      | G-pink           | g2437  | Nudix domain protein                         |
| 5 | F-brown                      | G-pink           | g2480  | NADH: flavin oxidoreductase<br>NADH oxidase  |
| 6 | F-brown                      | G-pink           | g7286  | Phenylacetyl-ligase                          |
| 1 | F-red                        | G-pink           | g5330  | GTP cyclohydrolase I                         |
| 2 | F-red                        | G-pink           | g9404  | Glutathione S-transferase                    |
| 1 | F-darkred                    | G-pink           | g6235  | NA                                           |
| 2 | F-darkred                    | G-pink           | g6412  | Coproporphyrinogen III oxidase protein       |
| 1 | F-red                        | G-blue           | g5330  | GTP cyclohydrolase I                         |
| 2 | F-red                        | G-blue           | g9404  | Glutathione S-transferase                    |
| 3 | F-red                        | G-blue           | g9410  | NA                                           |
| 1 | F-brown                      | G-blue           | g11115 | Rta1 domain protein                          |
| 2 | F-brown                      | G-blue           | g12383 | ABC transporter protein                      |
| 3 | F-brown                      | G-blue           | g2437  | Nudix domain protein                         |
| 4 | F-brown                      | G-blue           | g2480  | NADH: flavin oxidoreductase<br>NADH oxidase  |
| 5 | F-brown                      | G-blue           | g7286  | Phenylacetyl-ligase                          |
| 6 | F-brown                      | G-blue           | g7634  | O-methyltransferase                          |
| 1 | F-red                        | G-salmon         | g10224 | AAA family ATPase                            |
| 2 | F-red                        | G-salmon         | g2681  | Polyketide synthase                          |
| 3 | F-red                        | G-salmon         | g2686  | Siderophore transporter,<br>RhtX/FptX family |
| 4 | F-red                        | G-salmon         | g3098  | Cross-pathway control protein 1              |
| 5 | F-red                        | G-salmon         | g5330  | GTP cyclohydrolase i                         |
| 6 | F-red                        | G-salmon         | g9404  | Glutathione S-transferase                    |
| 1 | F-brown                      | G-salmon         | g2437  | Nudix domain protein                         |
| 2 | F-brown                      | G-salmon         | g5563  | Fungal specific transcription factor domain  |
| 3 | F-brown                      | G-salmon         | g7069  | ATPase AAA+ type core protein                |
| 4 | F-brown                      | G-salmon         | g7634  | Catechol O-methyltransferase                 |
| 1 | F-darkred                    | G-salmon         | g6235  | NA                                           |
| 2 | F-darkred                    | G-salmon         | g6412  | Coproporphyrinogen III oxidase protein       |
| 1 | F-brown                      | G-green          | g4867  | NA                                           |

|   |           |         |       |                                                |
|---|-----------|---------|-------|------------------------------------------------|
| 2 | F-brown   | G-green | g5563 | Fungal specific transcription<br>factor domain |
| 1 | F-darkred | G-green | g3337 | Phosphoglycerate kinase                        |
| 2 | F-darkred | G-green | g6235 | NA                                             |
| 3 | F-darkred | G-green | g6412 | Coproporphyrinogen III oxidase<br>protein      |

---
